# Supplementary material
Source: PubMed Central journal article supplement (PMC8642316)
Supplement: NIHMS1752078-supplement-1.pdf [file NIHMS1752078-supplement-1.pdf]

**Figure S1**

**A** scRNA-seq by cell type (as shown in Fig. 1)  
n=75,523 cells

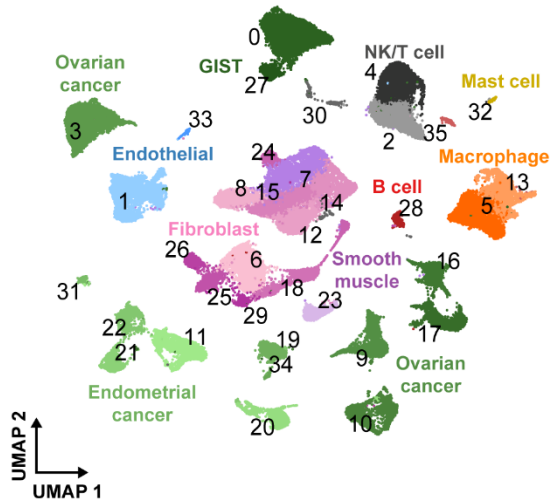

**B** scATAC-seq by inferred cell type (as shown in Fig. 1)  
n=74,621 cells

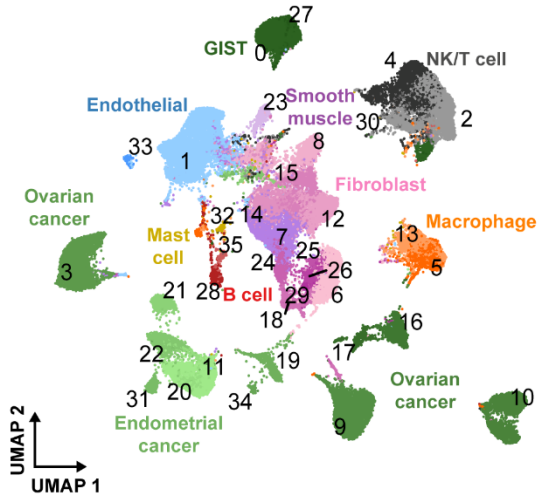

**C** Histogram of Seurat label transfer prediction scores  
n=74,621 cells

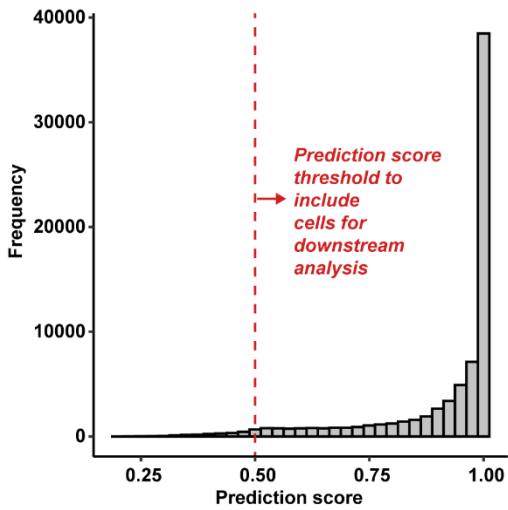

**D** scATAC-seq by Seurat label transfer prediction score  
n=74,621 cells

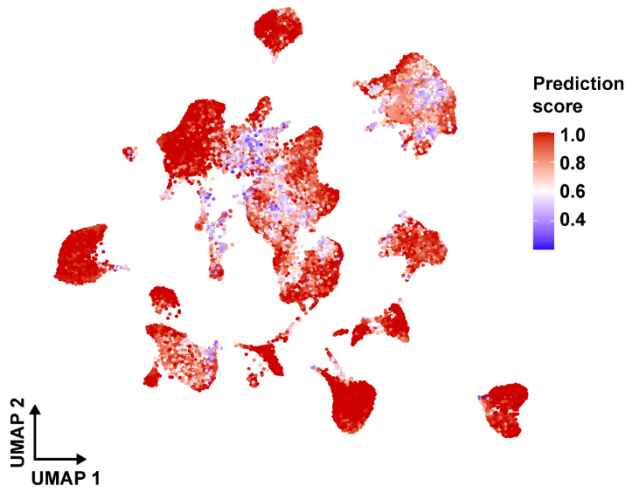

**Figure S1. Expanded view of matched scRNA-seq and scATAC-seq for 11 patient tumors, Related to Figure 1.**

**A)** UMAP plot of 75,523 scRNA-seq cells color-coded by cell type across 11 patient tumors. Cell type subclusters as determined by graph-based Louvain clustering are labeled on the UMAP.

**B)** UMAP plot of 74,621 scATAC-seq cells color-coded by inferred cell type across 11 patient tumors. Inferred cell type subclusters are labeled on the UMAP.

**C)** Histogram of scATAC-seq inferred cell type subcluster prediction scores. The dashed vertical line in red at 0.5 represents a threshold cutoff for including cells in downstream analysis.

**D)** UMAP plot of 74,621 scATAC-seq cells, as in **B**, but colored by prediction score.

**Figure S2**

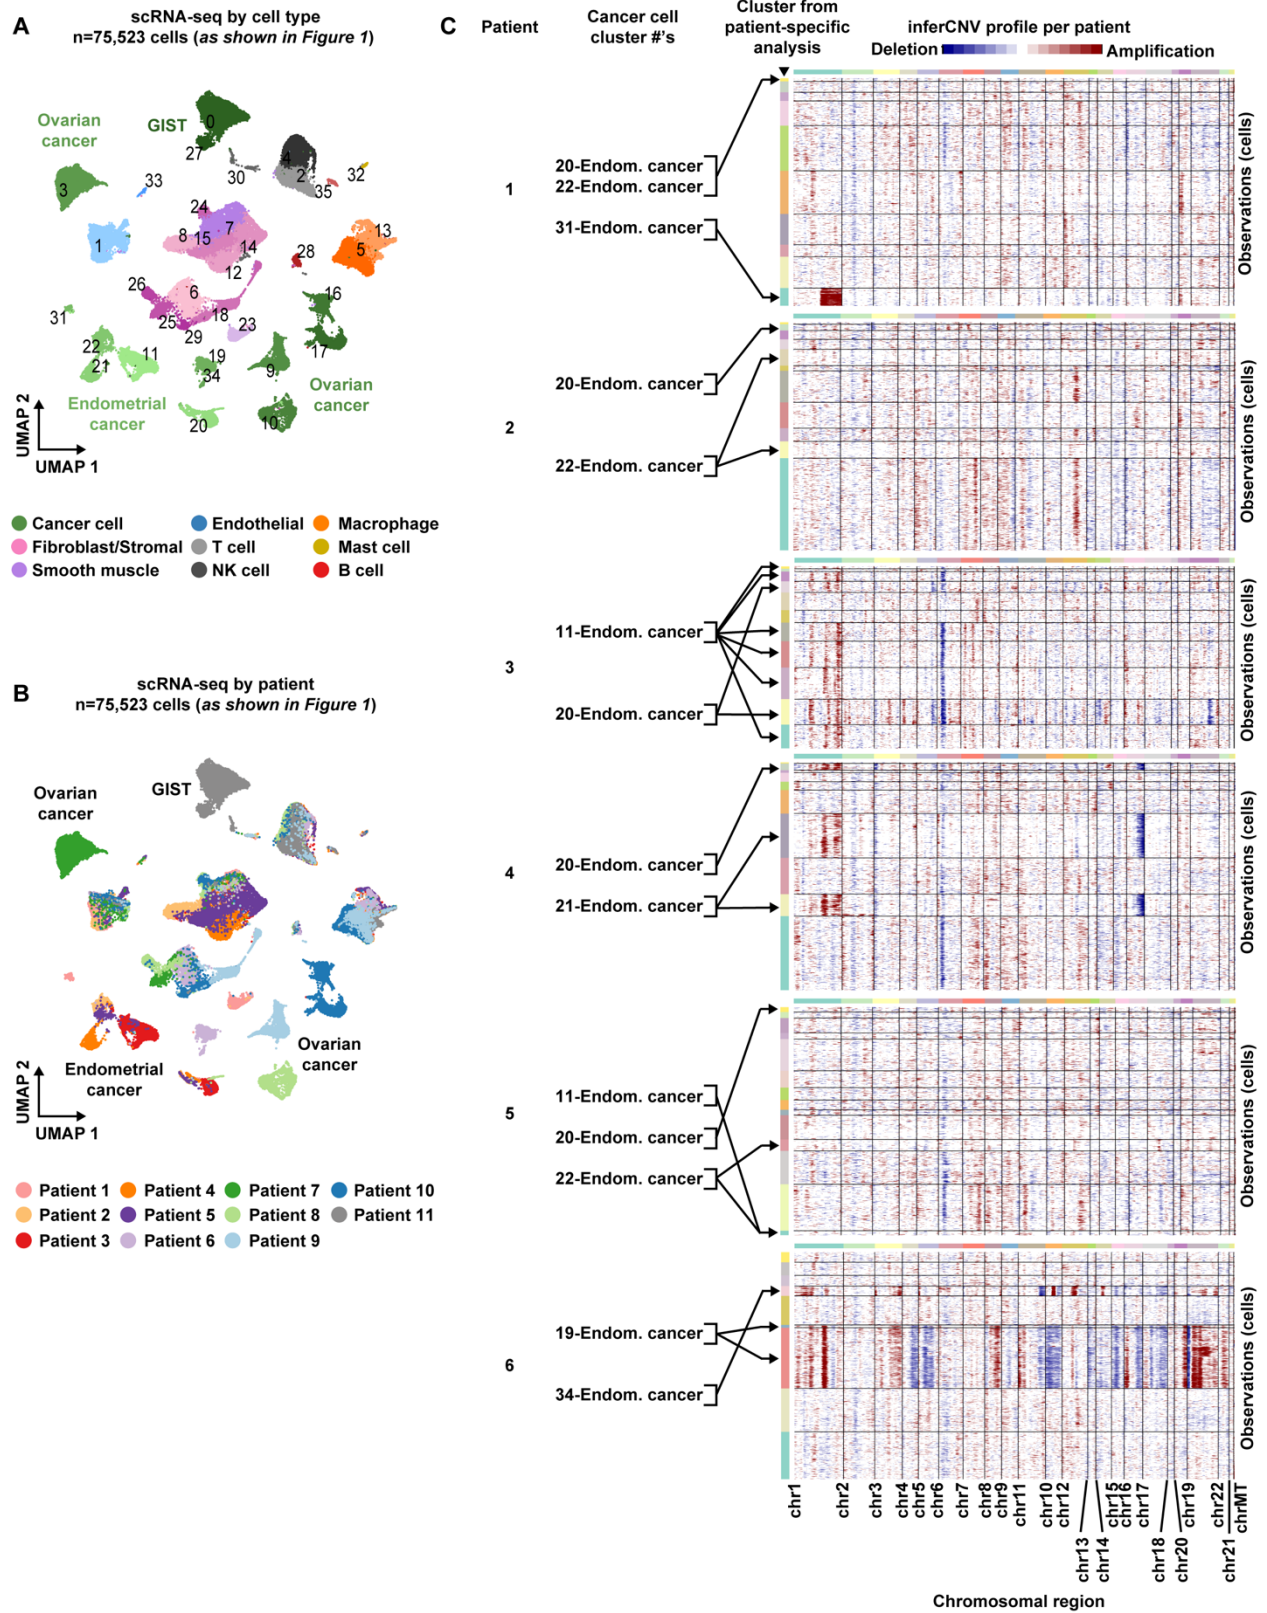

**Figure S2. InferCNV results for Patients 1-6 (endometrial cancer), Related to Figure 1.**

**A)** UMAP plot of 75,523 scRNA-seq cells color-coded by cell type and cell type subcluster number.

**B)** UMAP plot of 75,523 scRNA-seq cells, as in **A**, but color-coded by patient of origin.

**C)** InferCNV heatmaps of predicted CNV profiles in each patient tumor (*right*). Note that the inferCNV analysis was conducted for each patient tumor individually. Black arrows show the mapping between the full cohort cell type subclusters and the clusters from each patient-specific analysis (*middle*).



**Figure S3**

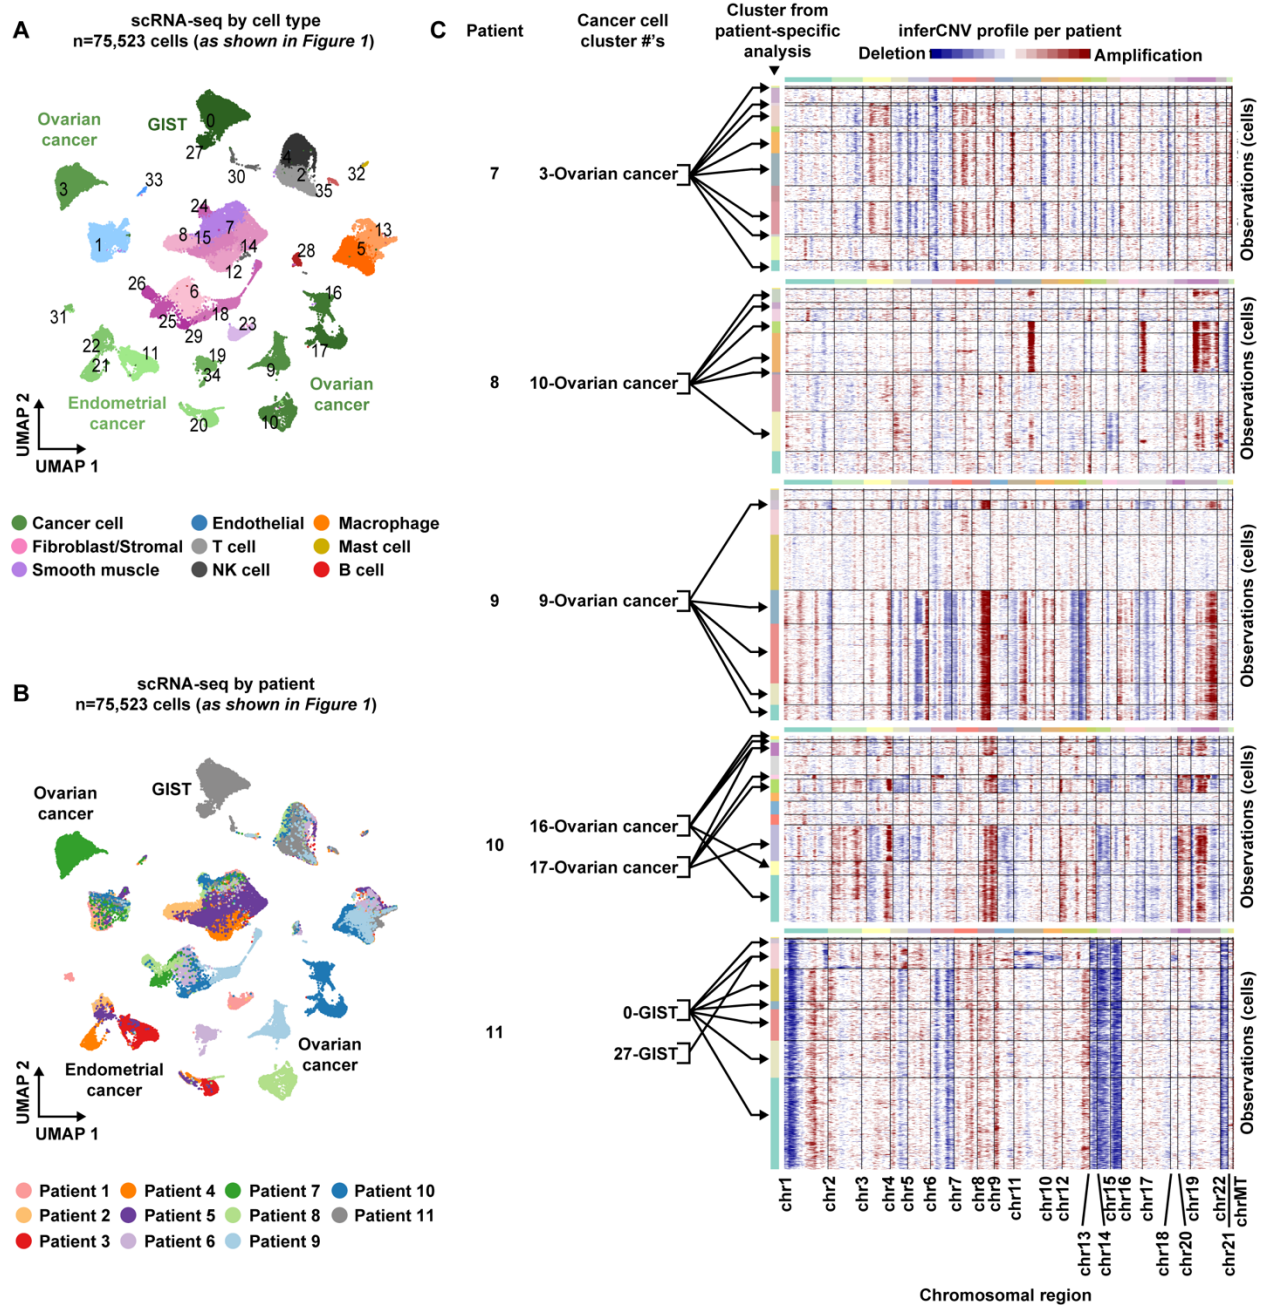

**Figure S3. InferCNV results for Patients 7-10 and 11 (ovarian cancer and GIST, respectively), Related to Figure 1.**

**A)** UMAP plot of 75,523 scRNA-seq cells color-coded by cell type and cell type subcluster number.

**B)** UMAP plot of 75,523 scRNA-seq cells, as in **A**, but color-coded by patient of origin.

**C)** InferCNV heatmaps of predicted CNV profiles in each patient tumor (*right*). Note that the inferCNV analysis was conducted for each patient tumor individually. Black arrows show the mapping between the full cohort cell type subclusters and the clusters from each patient-specific analysis (*middle*).

Figure S4

**A** scRNA-seq by cell type (as shown in Fig. 1)  
n=75,523 cells

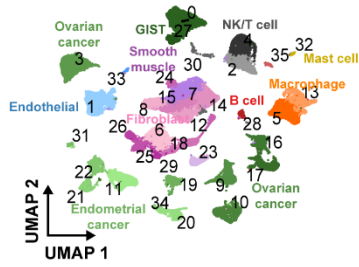

**C** # of inferCNV events per cell

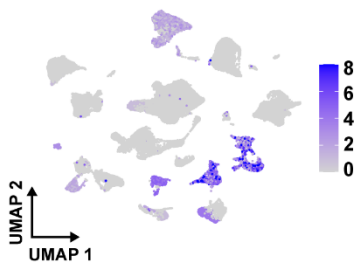

**D** MUC16/CA125 expression

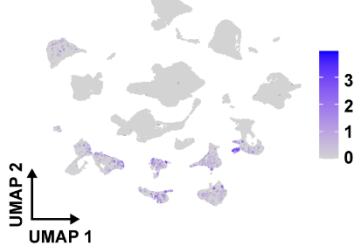

**E** WFDC2/HE4 expression

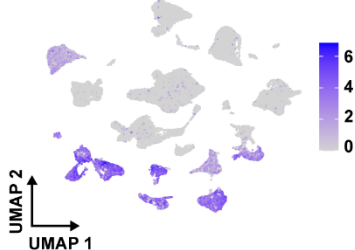

**F** KIT/CD117 expression

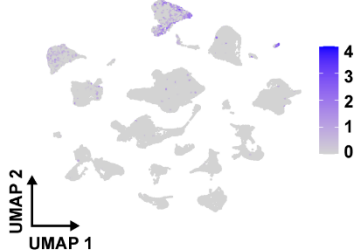

**B**

Endometrial cancer Ovarian cancer GIST Fibroblast/Stromal Smooth muscle Endothelial Macrophages Mast cell B cell

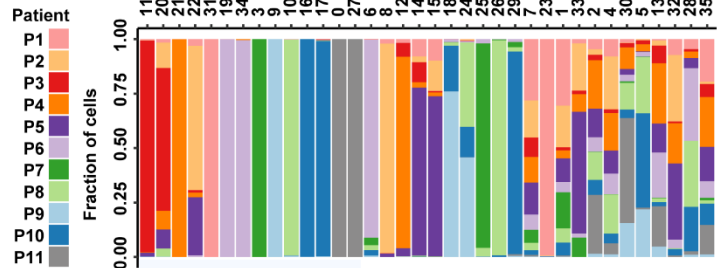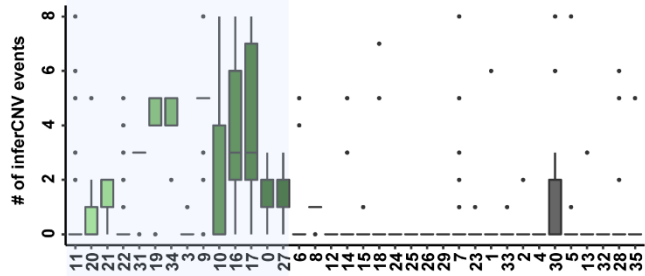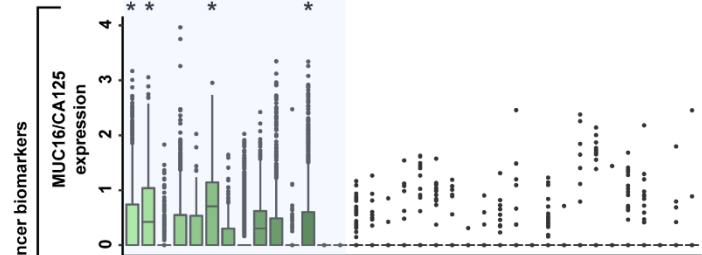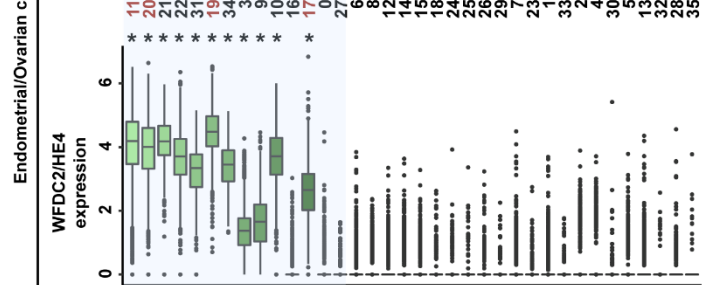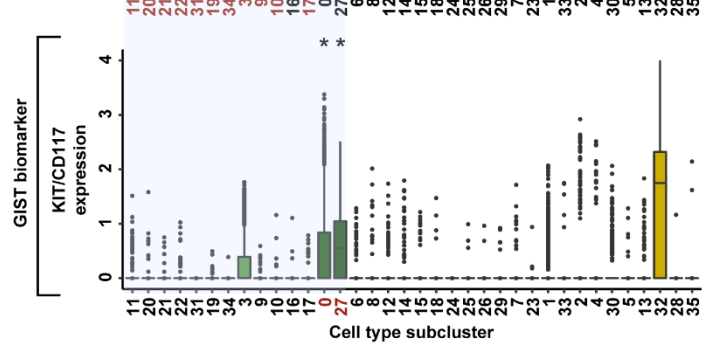

Cell type subcluster

**Figure S4. Identification of malignant cell type subclusters in scRNA-seq across the full cohort of 11 patient tumors, Related to Figure 1.**

**A)** UMAP plot of 75,523 scRNA-seq cells color-coded by cell type and cell type subcluster number.

**B)** Stacked bar chart, as in **Fig. 1D**, showing the contribution of each patient to each cell type subcluster in scRNA-seq (*top*). Boxplot showing the number of inferCNV events in each cell type subcluster (*second from top*). The blue shadow highlights cell type subclusters that are predicted to be malignant. Boxplot showing the expression level of ovarian/endometrial cancer biomarker *MUC16/CA125* across all cell type subclusters. The blue shadow highlights cell type subclusters that are predicted to be malignant. Asterisks denote a statistically significant difference in gene expression (Wilcoxon Rank Sum test, Bonferroni-corrected  $p$ -value  $<0.01$ ) between the marked cell type subcluster and the remaining cells outside of the blue shadow (*middle*). Boxplot showing the expression level of ovarian/endometrial cancer biomarker *WFDC2/HE4* across all cell type subclusters. The blue shadow highlights cell type subclusters that are predicted to be malignant. Asterisks denote a statistically significant difference in gene expression (Wilcoxon Rank Sum test, Bonferroni-corrected  $p$ -value  $<0.01$ ) between the marked cell type subcluster and the remaining cells outside of the blue shadow (*second from bottom*). Boxplot showing the expression level of GIST biomarker *KIT/CD117* across all cell type subclusters. The blue shadow highlights cell type subclusters that are predicted to be malignant. Asterisks denote a statistically significant difference in gene expression (Wilcoxon Rank Sum test, Bonferroni-corrected  $p$ -value  $<0.01$ ) between the marked cell type subcluster and the remaining cells outside of the blue shadow (*bottom*).

**C)** UMAP plot of 75,523 scRNA-seq cells, as in **A**, but colored by total number of inferCNV events per cell.

**D)** UMAP plot of 75,523 scRNA-seq cells, as in **A**, but colored by the normalized expression level of ovarian/endometrial cancer biomarker *MUC16/CA125*.

**E)** UMAP plot of 75,523 scRNA-seq cells, as in **A**, but colored by the normalized expression level of ovarian/endometrial cancer biomarker *WFDC2/HE4*.

**F)** UMAP plot of 75,523 scRNA-seq cells, as in **A**, but colored by the normalized expression level of GIST biomarker *KIT/CD117*.

**Figure S5**

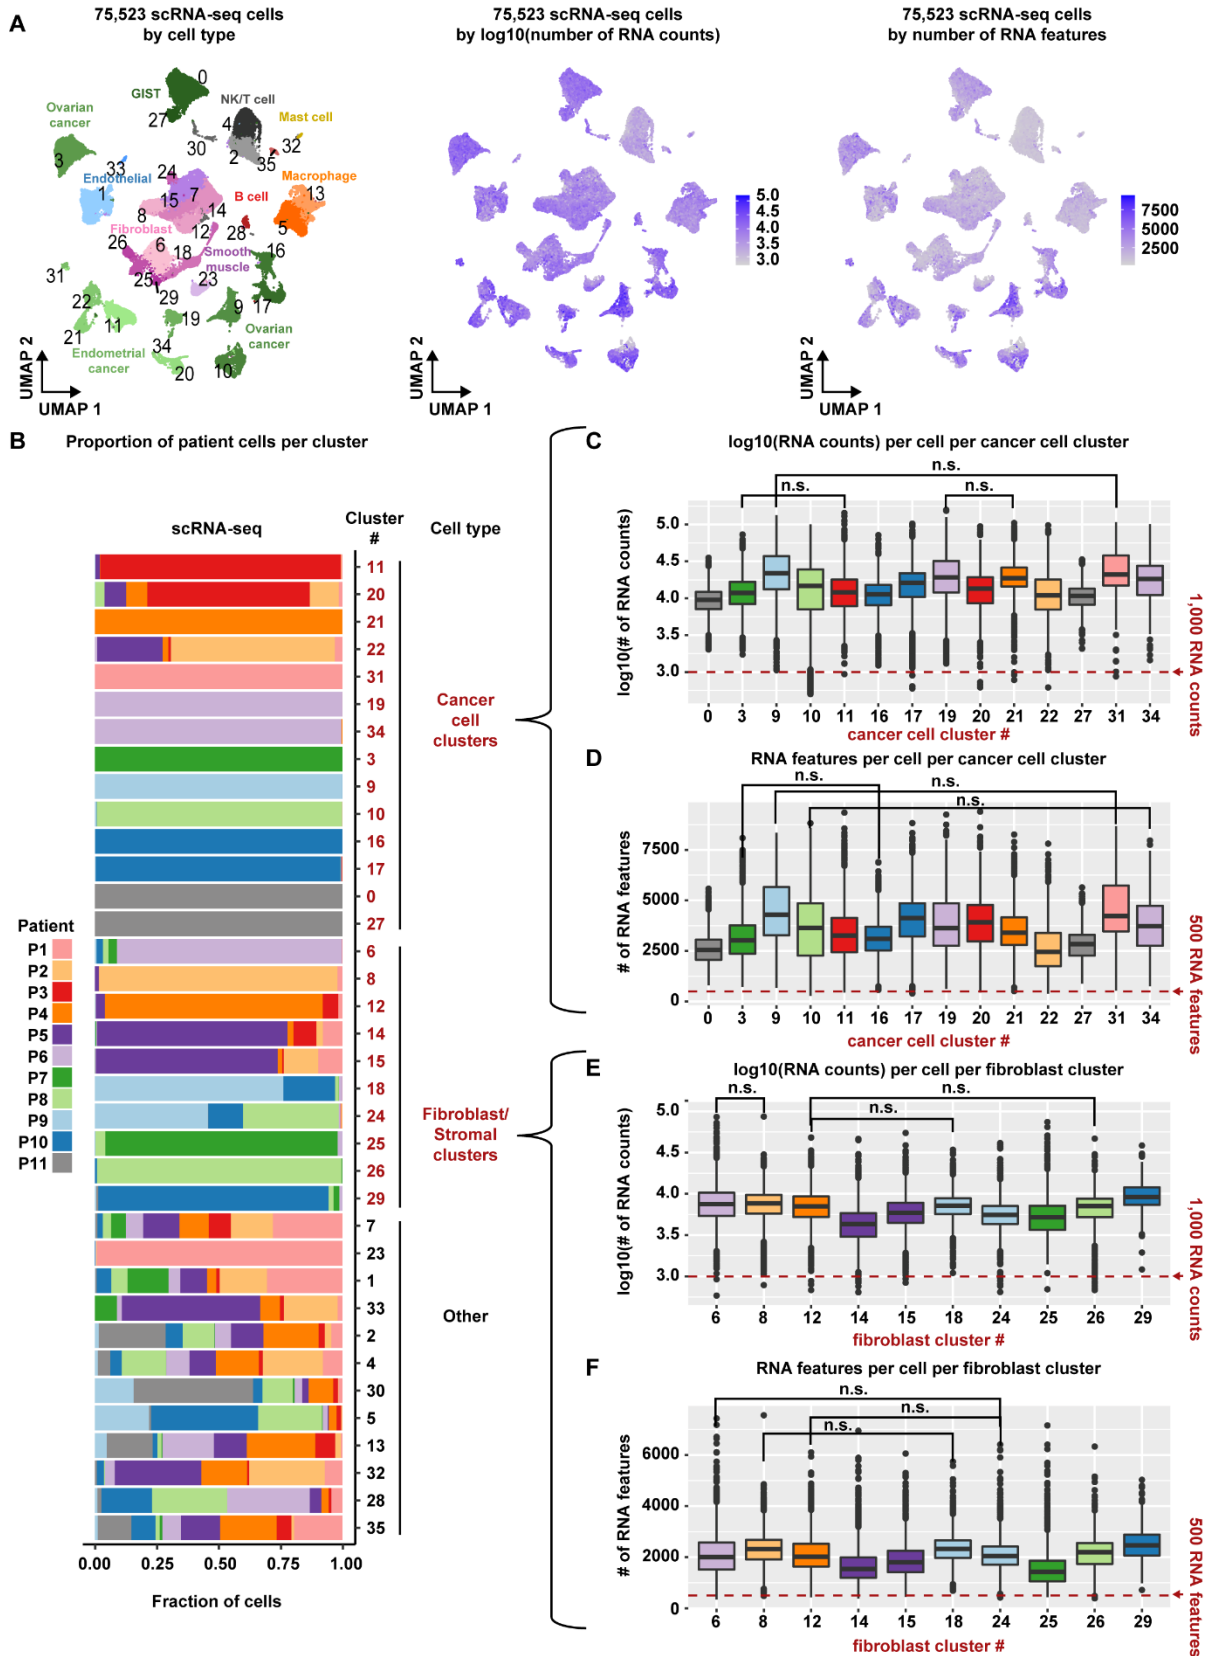

**Figure S5. Malignant and fibroblast cell type subclusters in scRNA-seq show high patient-specificity relative to endothelial and immune subclusters, Related to Figure 1.**

**A)** UMAP plot of 75,523 scRNA-seq cells color-coded by cell type and cell type subcluster number (*left*). UMAP plot of 75,523 scRNA-seq cells, as in *left*, but color-coded by  $\log_{10}$ (number of RNA counts) per cell (*middle*). UMAP plot of 75,523 scRNA-seq cells, as in *left*, but color-coded by number of RNA features per cell (*right*).

**B)** Stacked bar chart, as in **Fig. 1D**, showing the contribution of each patient to each cell type subcluster in scRNA-seq. Malignant or cancer cell subclusters and fibroblast subclusters are marked in red text.

**C)** Boxplot showing the distribution of  $\log_{10}$ (RNA counts) per cell for each malignant cell type subcluster. N.S. stands for a statistically insignificant difference between the marked subclusters.

**D)** Boxplot showing the distribution of RNA features per cell for each malignant cell type subcluster. N.S. stands for a statistically insignificant difference between the marked subclusters.

**E)** Boxplot showing the distribution of  $\log_{10}$ (RNA counts) per cell for each fibroblast cell type subcluster. N.S. stands for a statistically insignificant difference between the marked subclusters.

**F)** Boxplot showing the distribution of RNA features per cell for each fibroblast cell type subcluster. N.S. stands for a statistically insignificant difference between the marked subclusters.



Figure S6

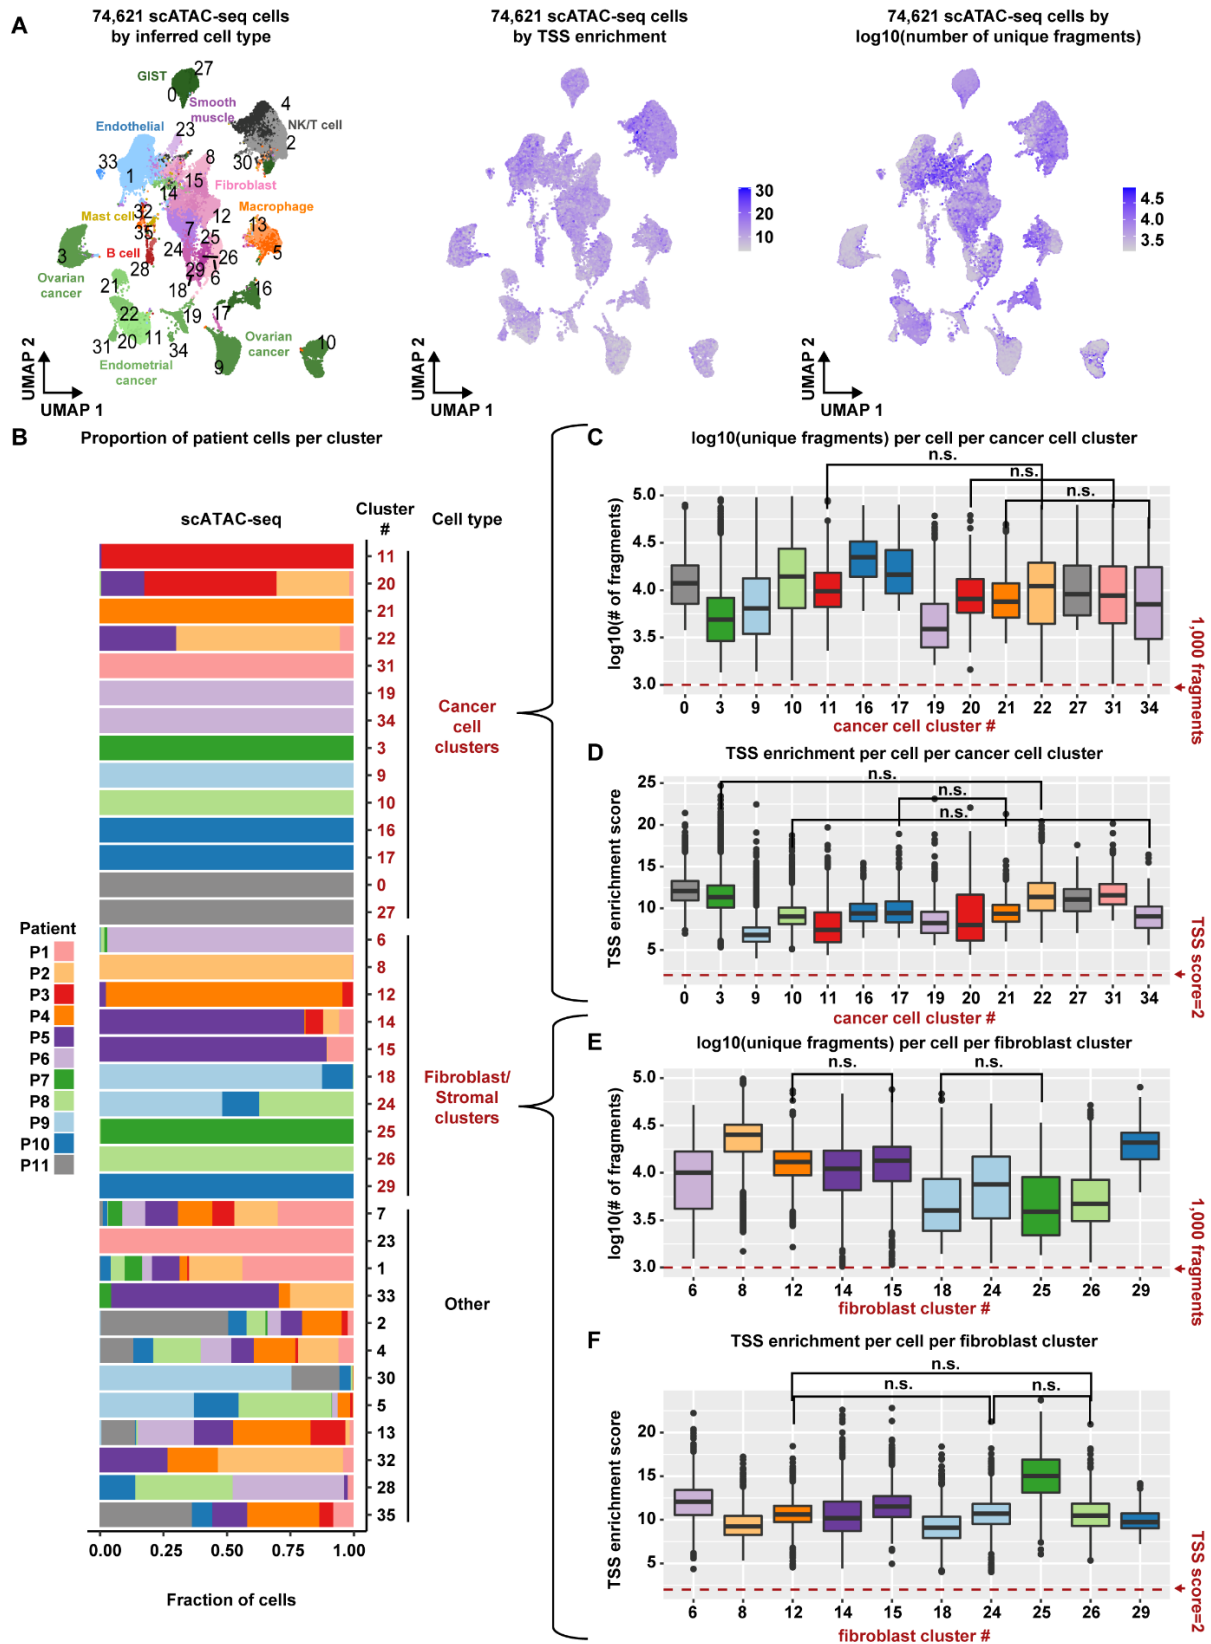

**Figure S6. Malignant and fibroblast cell type subclusters in scATAC-seq show high patient-specificity relative to endothelial and immune subclusters, Related to Figure 1.**

**A)** UMAP plot of 74,621 scATAC-seq cells color-coded by inferred cell type and inferred cell type subcluster number (*left*). UMAP plot of 74,621 scATAC-seq cells, as in *left*, but color-coded by TSS enrichment score (*middle*). UMAP plot of 74,621 scATAC-seq cells, as in *left*, but color-coded by  $\log_{10}$ (number of unique fragments) (*right*).

**B)** Stacked bar chart, as in **Fig. 1D**, showing the contribution of each patient to each inferred cell type subcluster in scATAC-seq. Malignant or cancer cell subclusters and fibroblast subclusters are marked in red text.

**C)** Boxplot showing the distribution of  $\log_{10}$ (number of unique fragments) for each malignant cell type subcluster. N.S. stands for a statistically insignificant difference between the marked subclusters.

**D)** Boxplot showing the distribution of TSS enrichment score for each malignant cell type subcluster. N.S. stands for a statistically insignificant difference between the marked subclusters.

**E)** Boxplot showing the distribution of  $\log_{10}$ (number of unique fragments) per cell for each fibroblast cell type subcluster. N.S. stands for a statistically insignificant difference between the marked subclusters.

**F)** Boxplot showing the distribution of TSS enrichment score for each fibroblast cell type subcluster. N.S. stands for a statistically insignificant difference between the marked subclusters.

**Figure S7**

**A** Peak-to-gene correlation analysis with empirically derived FDR:

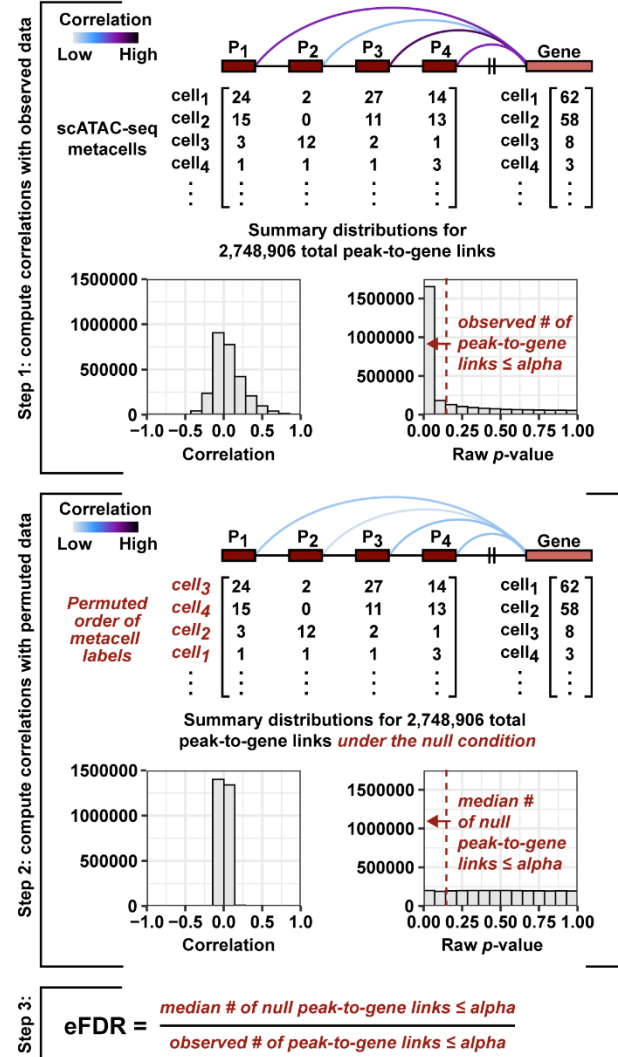

**B** Peak-to-gene correlation analysis with p-value alpha threshold set to the first quartile of the observed p-value distribution

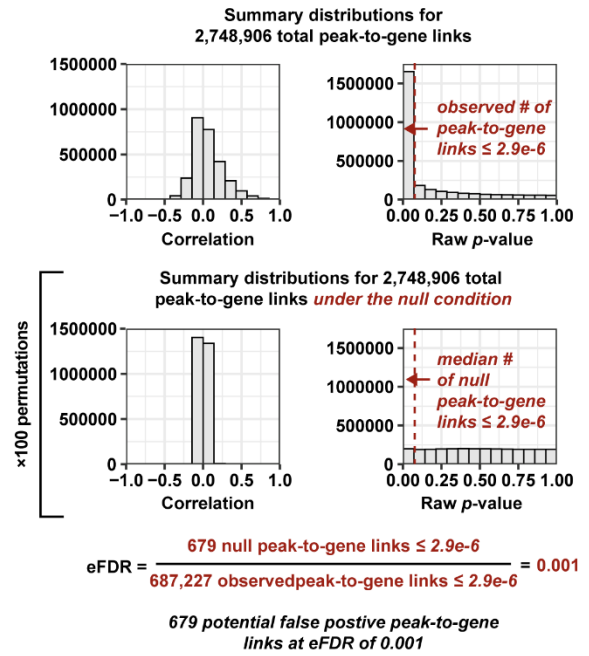

**C** Peak-to-gene correlation analysis with p-value alpha threshold set to 1e-12

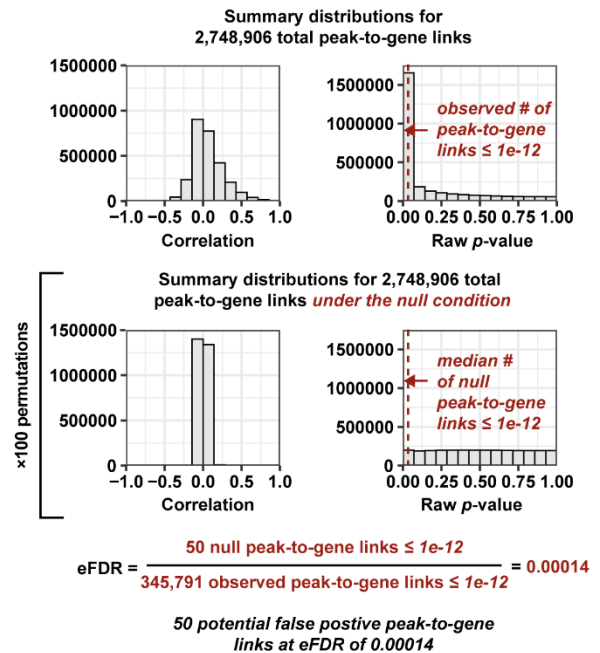

**D** Screening for distal peak-to-gene links with positive regulatory effect (positive correlation):

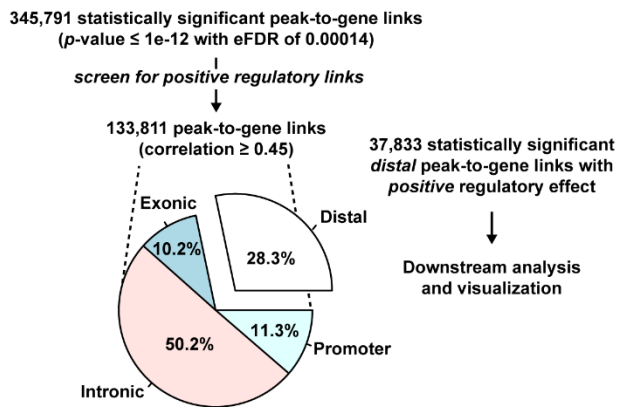

**Figure S7. Peak-to-gene correlation analysis with an empirically derived FDR for the full cohort of 11 patient tumors, Related to Figure 2 and STAR Methods.**

**A)** Schematic illustrating the peak-to-gene correlation analysis. **Step 1:** the peak count information from scATAC-seq cells is aggregated into metacells via a KNN algorithm before computing the correlation between every peak and every gene on the same chromosome. The distribution of correlation values and raw p-values are visualized in histograms and the number of observed peak-to-gene link tests  $\leq \alpha$  is recorded. **Step 2:** the peak-to-gene correlations are re-computed for a permuted null version of the dataset where the scATAC-seq metacell labels are shuffled, breaking the link or any potential correlation between peaks and genes. The process is repeated for a total of 100 permutations. For each permutation, the number of null peak-to-gene link tests  $\leq \alpha$  is recorded. As an example, the distribution of null correlation values and null raw p-values are visualized in histograms for one permutation run. **Step 3:** The median number of null peak-to-gene link tests  $\leq \alpha$  across 100 permutations is divided by the number of observed peak-to-gene link tests  $\leq \alpha$  to arrive at an empirically derived FDR (eFDR).

**B)** The peak-to-gene correlation analysis, as described in **A**, but using an alpha threshold equal to the first quartile in the distribution of raw p-values.

**C)** The peak-to-gene correlation analysis, as described in **A**, but using an alpha threshold equal to  $1e-12$ .

**D)** Flow chart demonstrating the screening procedure used to identify distal peak-to-gene links with positive regulatory effects. The pie chart depicts the proportion of positive regulatory peak-to-gene links that are distal peak-to-gene relationships.

**Figure S8**

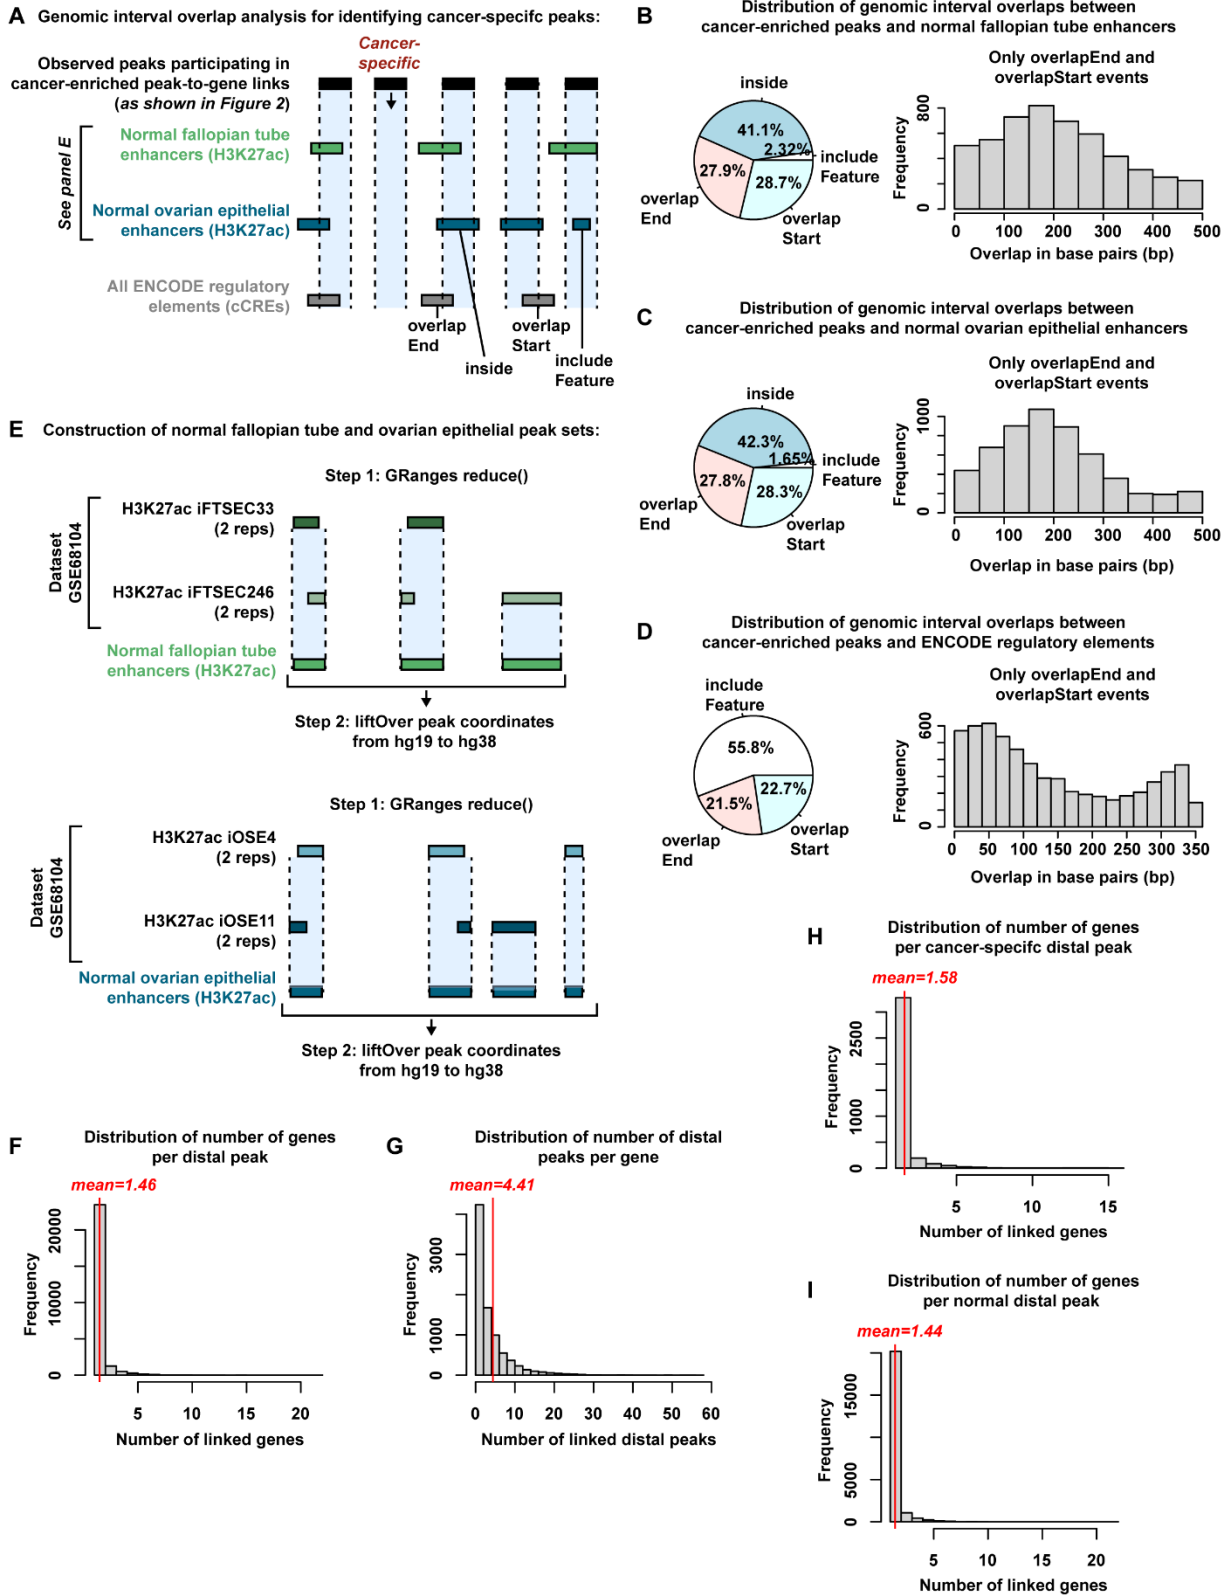

**Figure S8. Genomic coordinate overlap analysis for identifying cancer-specific distal peak-to-gene links across the full cohort of 11 patient tumors, Related to Figure 2 and STAR Methods.**

- A)** Cartoon depicting the genomic coordinate overlap analysis between the observed peaks participating in cancer-enriched distal peak-to-gene links and three other reference peak sets (normal fallopian tube H3K27ac peaks [*green*], normal ovarian epithelial H3K27ac peaks [*blue*], and all ENCODE regulatory elements [*gray*]).
- B)** Pie chart and histogram summarizing the distribution of genomic overlap events between the cancer-enriched peaks and the normal fallopian tube H3K27ac peaks.
- C)** Pie chart and histogram summarizing the distribution of genomic overlap events between the cancer-enriched peaks and the normal ovarian epithelial H3K27ac peaks.
- D)** Pie chart and histogram summarizing the distribution of genomic overlap events between the cancer-enriched peaks and the ENCODE regulatory elements.
- E)** Cartoon illustrating the procedure for creating the normal fallopian tube enhancer peak set (green, *top*) and normal ovarian epithelial enhancer peak set (blue, *bottom*).
- F)** Histogram showing the distribution of number of genes per distal peak. The solid red line represents the mean number of genes per distal peak.
- G)** Histogram showing the distribution of number of distal peaks per gene. The solid red line represents the mean number of distal peaks per gene.
- H)** Histogram showing the distribution of number of genes per cancer-specific distal peak. The solid red line represents the mean number of genes per cancer-specific distal peak.
- I)** Histogram showing the distribution of number of genes per normal distal peak. The solid red line represents the mean number of genes per normal distal peak.



Figure S9

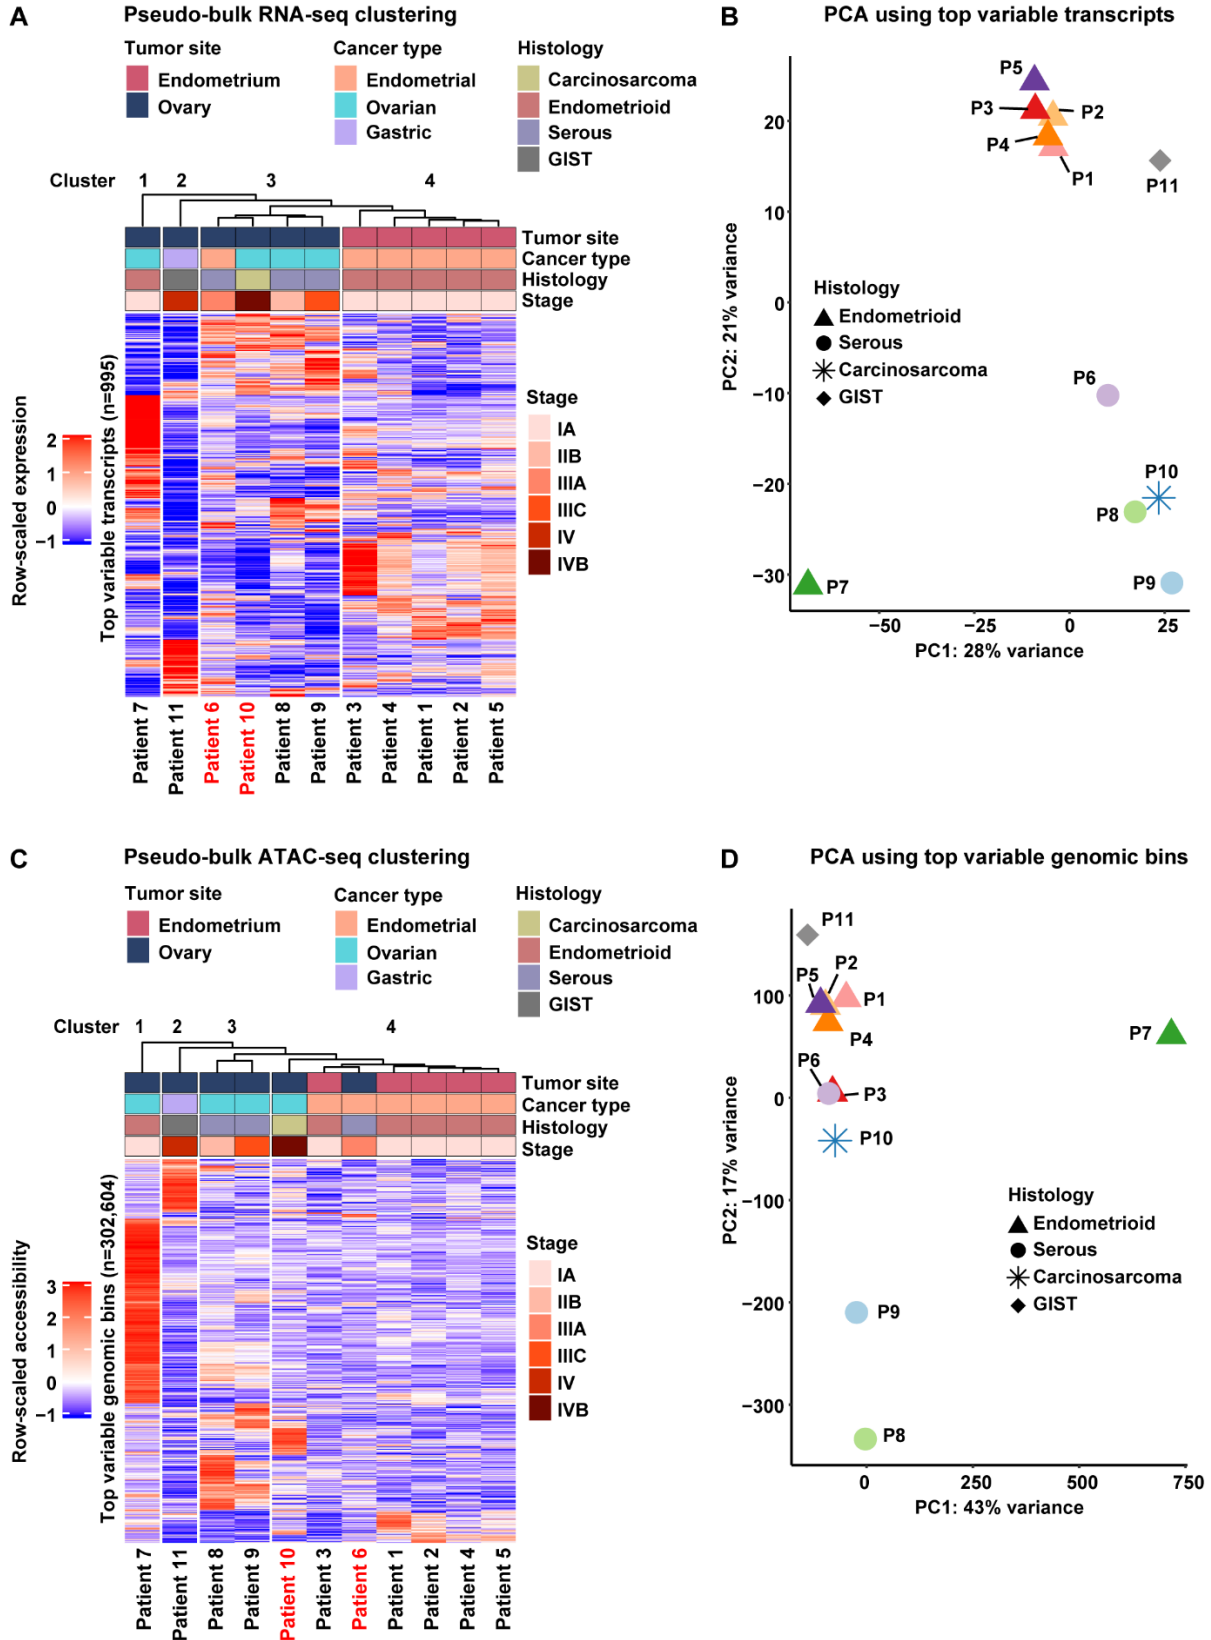

**Figure S9. Cluster analysis of pseudo-bulk transcriptome and chromatin accessibility profiles for 11 patient tumors, Related to Figures 3 & 4.**

**A)** Transcriptome-based hierarchical clustering and row-scaled heatmap using the top 5% variable features (n=985 transcripts). The indicated clusters in the dendrogram are statistically significant as determined by SigClust2.

**B)** Transcriptome-based PCA using the same features as in panel **A**.

**C)** Chromatin accessibility-based hierarchical clustering and row-scaled heatmap using the top 5% variable features. Note that only 3,000 randomly sampled features are shown in the heatmap out of 302,604 variable genomic bins. The indicated clusters in the dendrogram are statistically significant as determined by SigClust2.

**D)** Chromatin accessibility-based PCA using the top 5% variable features (n=302,604 genomic bins).

**Figure S10**

**A** scRNA-seq by cell type (as shown in Fig. 3)  
n=32,234

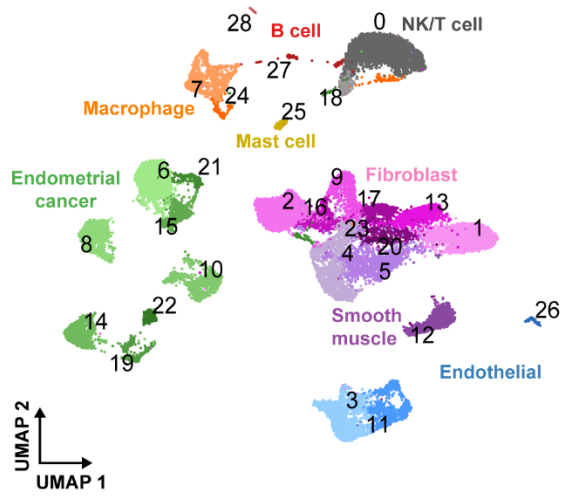

**B** scATAC-seq by inferred cell type (as shown in Fig. 3)  
n=32,155

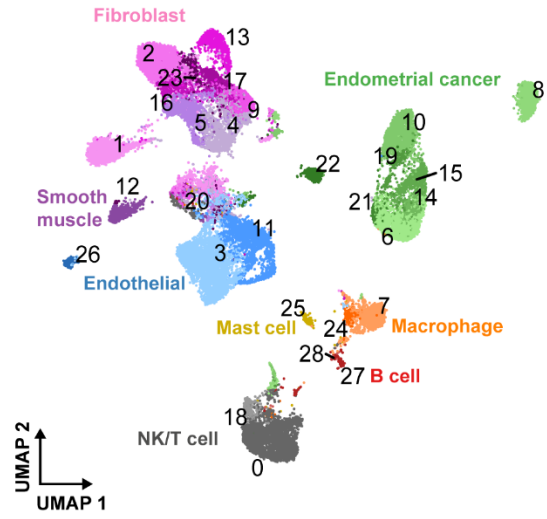

**C** Histogram of Seurat label transfer prediction scores  
n=32,155

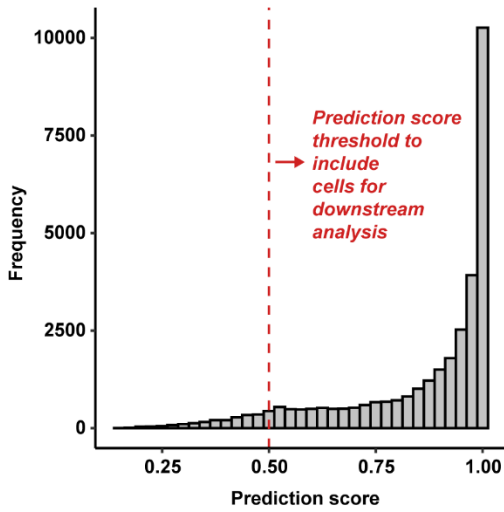

**D** scATAC-seq by Seurat label transfer prediction score  
n=32,155

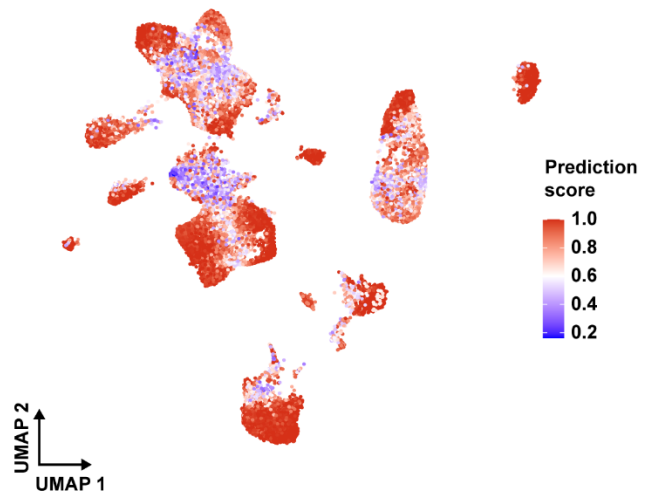

**Figure S10. Expanded view of matched scRNA-seq and scATAC-seq for the Endometrioid Endometrial Cancer patient cohort, Related to Figure 3.**

**A)** UMAP plot of 32,234 scRNA-seq cells color-coded by cell type across the **EEC patient cohort**. Cell type subclusters as determined by graph-based Louvain clustering are labeled on the UMAP.

**B)** UMAP plot of 32,155 scATAC-seq cells color-coded by inferred cell type across the **EEC patient cohort**. Inferred cell type subclusters are labeled on the UMAP.

**C)** Histogram of scATAC-seq inferred cell type subcluster prediction scores. The dashed vertical line in red at 0.5 represents a threshold cutoff for including cells in downstream analysis.

**D)** UMAP plot of 32,155 scATAC-seq cells, as in **B**, but colored by prediction score.

**Figure S11**

**A** scRNA-seq by cell type (as shown in Fig. 3)  
n=32,234 cells

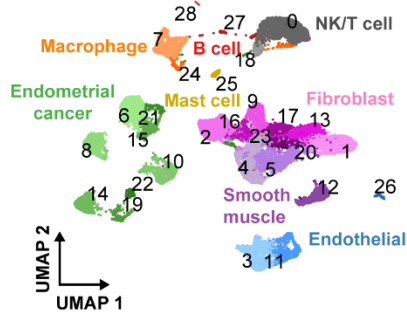

**C** MUC16/CA125 expression

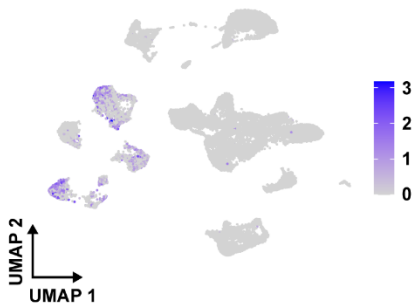

**D** WFDC2/HE4 expression

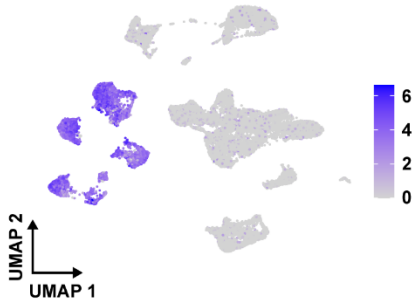

**B**

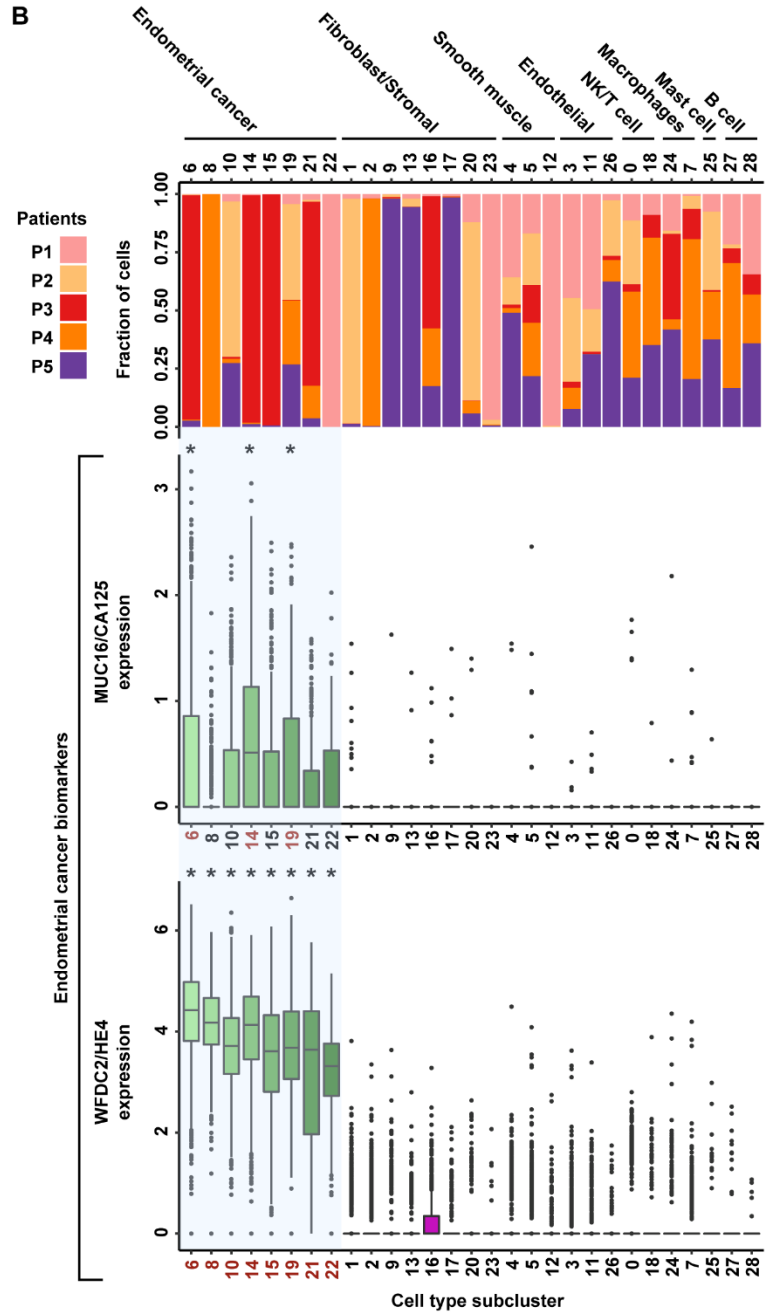

**Figure S11. Identification of malignant cell type subclusters in scRNA-seq across the Endometrioid Endometrial Cancer patient cohort (Patients 1-5), Related to Figure 3.**

**A)** UMAP plot of 32,234 scRNA-seq cells color-coded by cell type and cell type subcluster number.

**B)** Stacked bar chart, as in **Fig. 3C**, showing the contribution of each patient to each cell type subcluster in scRNA-seq (*top*). Boxplot showing the expression level of ovarian/endometrial cancer biomarker *MUC16/CA125* across all cell type subclusters. The blue shadow highlights cell type subclusters that are predicted to be malignant. Asterisks denote a statistically significant difference in gene expression (Wilcoxon Rank Sum test, Bonferroni-corrected  $p$ -value  $<0.01$ ) between the marked cell type subcluster and the remaining cells outside of the blue shadow (*middle*). Boxplot showing the expression level of ovarian/endometrial cancer biomarker *WFDC2/HE4* across all cell type subclusters. The blue shadow highlights cell type subclusters that are predicted to be malignant. Asterisks denote a statistically significant difference in gene expression (Wilcoxon Rank Sum test, Bonferroni-corrected  $p$ -value  $<0.01$ ) between the marked cell type subcluster and the remaining cells outside of the blue shadow (*bottom*).

**C)** UMAP plot of 32,234 scRNA-seq cells, as in **A**, but colored by the normalized expression level of endometrial cancer biomarker *MUC16/CA125*.

**D)** UMAP plot of 32,234 scRNA-seq cells, as in **A**, but colored by the normalized expression level of endometrial cancer biomarker *WFDC2/HE4*.



# Figure S12

**A**

Heatmaps of statistically significant distal peak-to-gene links with correlation  $\geq 0.45$  for Patients 1-5:

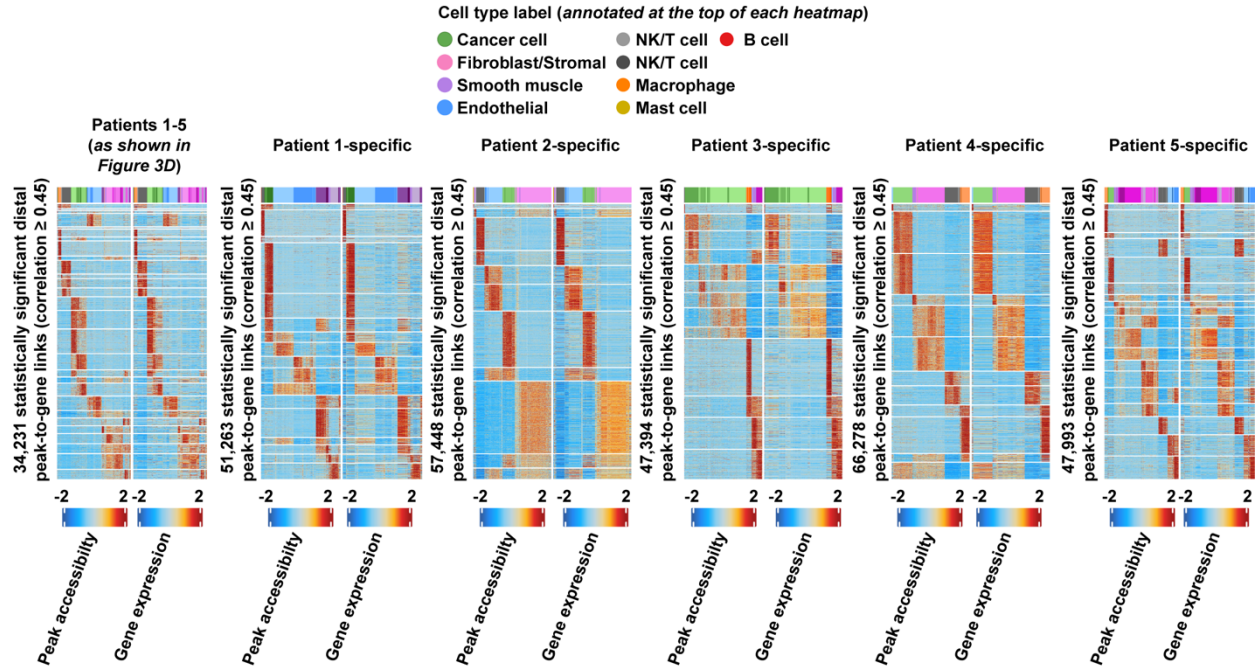

**B**

Venn diagrams showing the overlap of statistically significant distal peak-to-gene links with correlation  $\geq 0.45$  between the original Figure 3D analysis and each patient-specific analysis: (overlap of peak-gene pair character strings, NOT genomic coordinates)

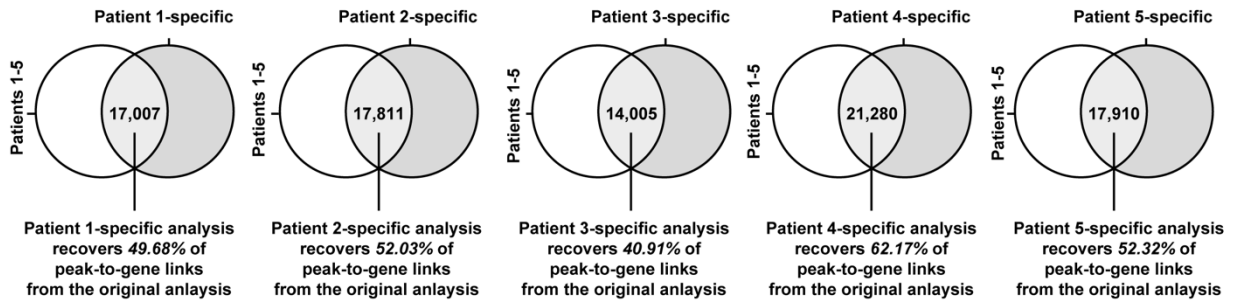

**Figure S12. Distal peak-to-gene links identified in the Endometrioid Endometrial Cancer patient cohort (Patients 1-5) are recovered by patient-specific peak-to-gene correlation analyses, Related to Figure 3.**

**A)** Row-scaled heatmaps of statistically significant distal peak-to-gene links where each row represents the expression of a gene (*right*) correlated to the accessibility of a distal peak (*left*). The leftmost heatmap was presented in **Fig. 3D** and the remaining heatmaps represent peak-to-gene analyses using only cells from the indicated patients.

**B)** Venn diagrams showing the overlap of peak-gene pair terms between the original **Fig. 3D** analysis and each patient-specific analysis. The percentage of peak-to-gene links recovered from the original Fig. 3D analysis is stated below each Venn diagram.

**Figure S13**

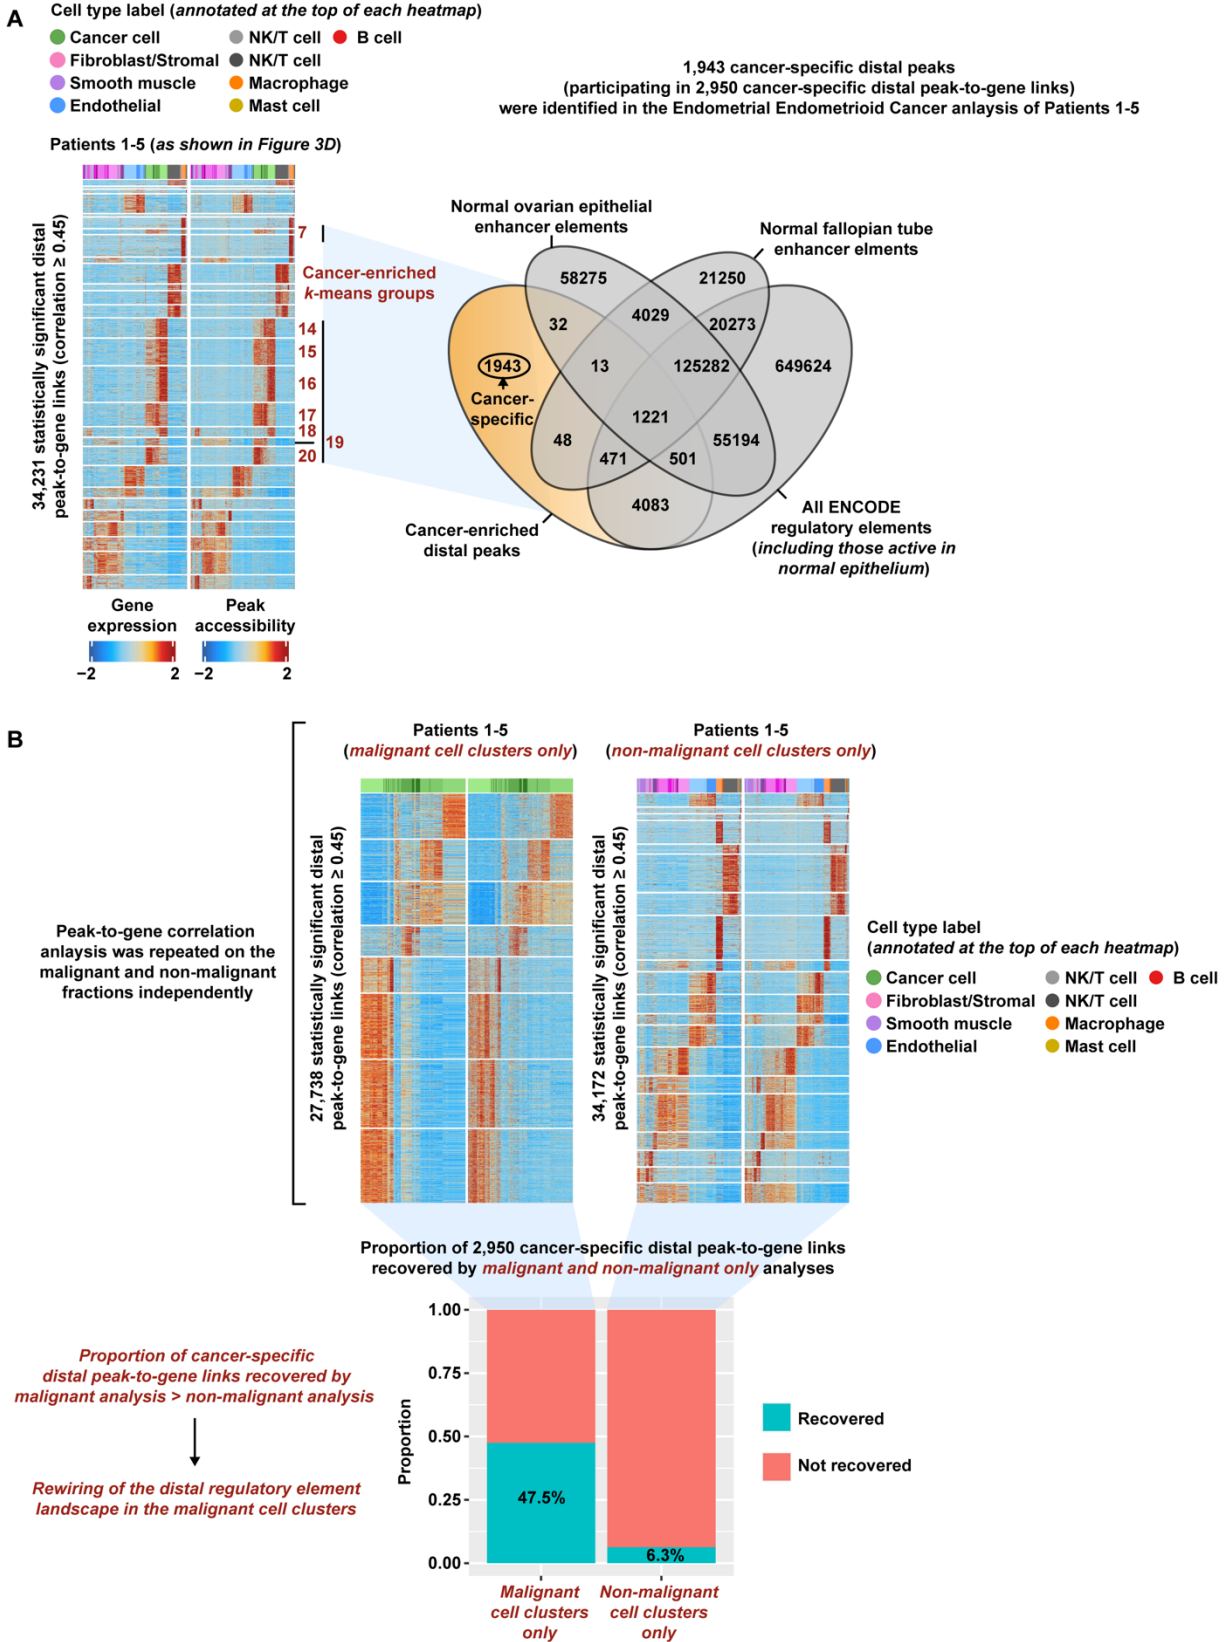

**Figure S13. Cancer-specific distal peak-to-gene links identified in the Endometrioid Endometrial Cancer patient cohort (Patients 1-5) are recovered by a malignant-specific peak-to-gene correlation analysis, Related to Figure 3.**

**A)** Row-scaled heatmaps of 34,231 statistically significant distal peak-to-gene links where each row represents the expression of a gene (*left*) correlated to the accessibility of a distal peak (*right*). Peak-to-gene links are grouped into *k*-means clusters and cancer-enriched *k*-means clusters are marked in red text. Cancer-enriched peaks that participate in cancer-enriched *k*-means groups are used as input into the genomic coordinate overlap analysis shown in the Venn diagram (*far right*). The Venn diagram shows the number of cancer-specific distal peaks (*orange slice*) after overlapping the genomic coordinates of cancer-enriched distal peaks with the genomic coordinates of normal ovarian surface epithelium enhancer elements, normal fallopian tube enhancer elements, and all ENCODE regulatory element annotations (*gray circles*).

**B)** Row-scaled heatmaps of statistically significant distal peak-to-gene links, as in **A**, but using only cells from malignant cell type subclusters (*left*) and non-malignant cell type subclusters (*right*). The proportion of cancer-specific distal peak-to-gene links recovered by each malignant and non-malignant-specific analysis is plotted in the stacked bar chart (*bottom*).

**Figure S14**

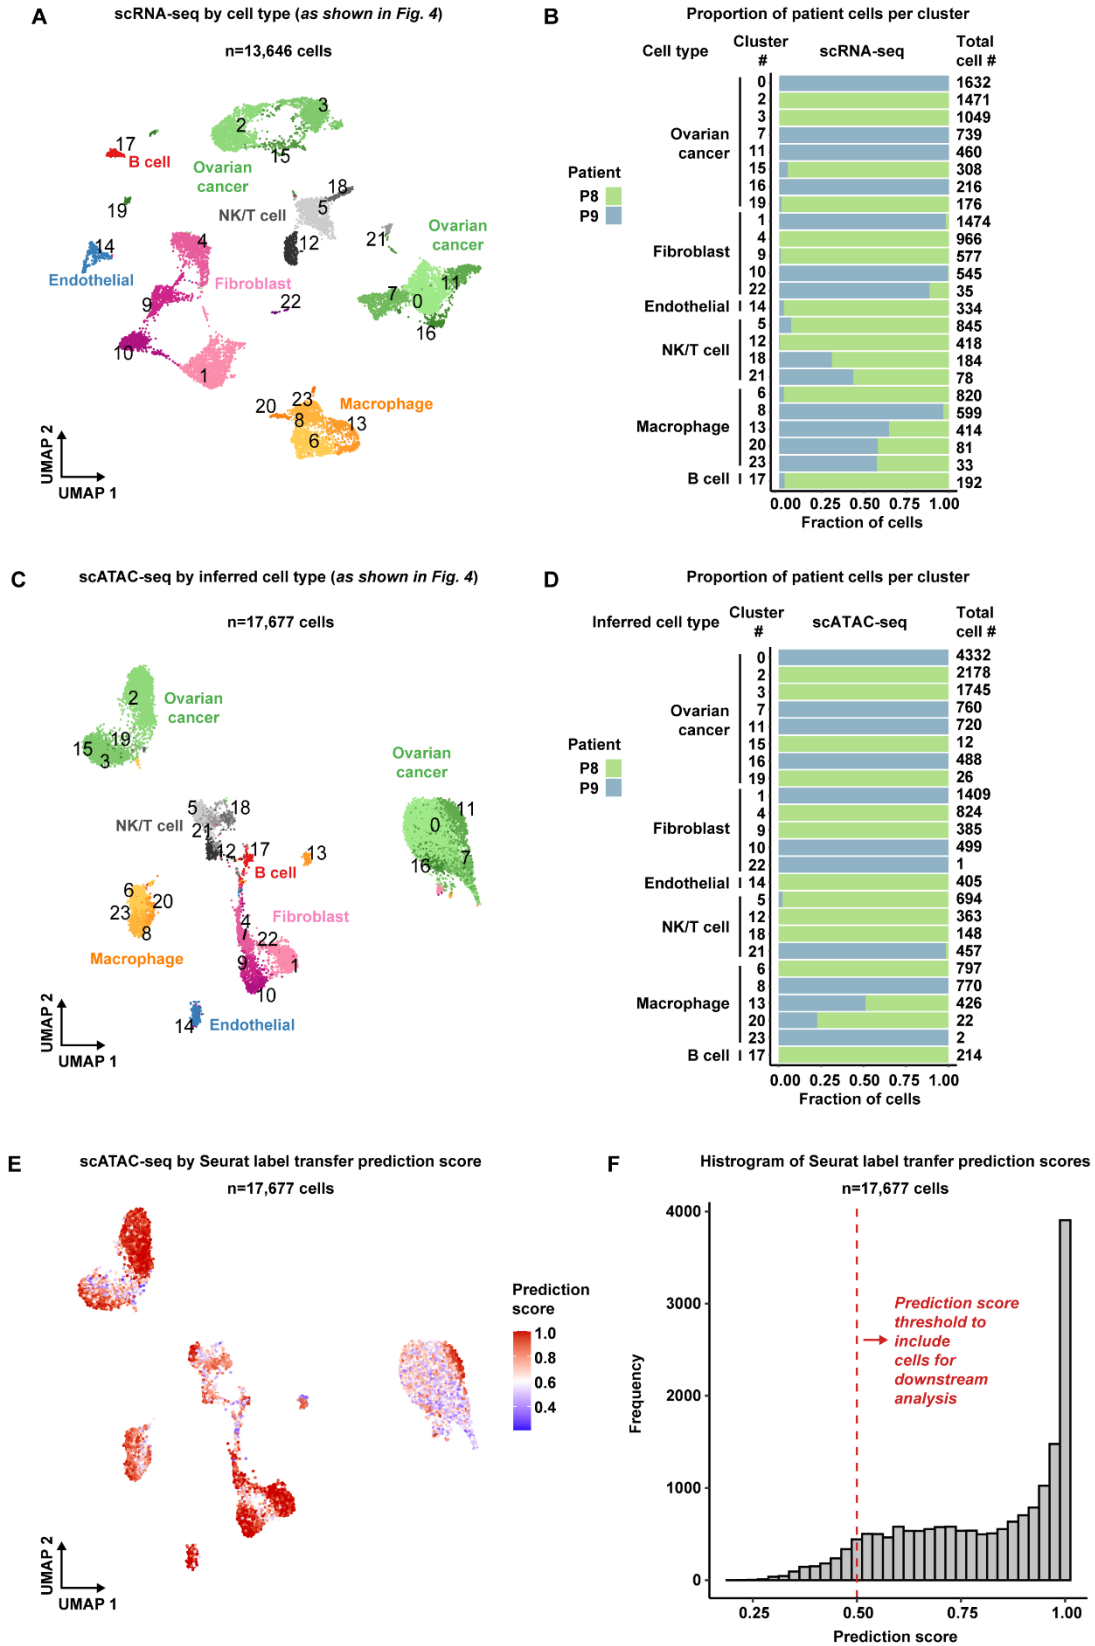

**Figure S14. Expanded view of matched scRNA-seq and scATAC-seq for the High-Grade Serous Ovarian Cancer patient cohort (Patient 8 & 9), Related to Figure 4.**

**A)** UMAP plot of 13,646 scRNA-seq cells color-coded by cell type across the **HGSOC patient cohort**. Cell type subclusters as determined by graph-based Louvain clustering are labeled on the UMAP.

**B)** Stacked bar chart showing the contribution of each patient to each cell type subcluster in scRNA-seq.

**C)** UMAP plot of 17,677 scATAC-seq cells color-coded by inferred cell type across the **HGSOC patient cohort**. Inferred cell type subclusters are labeled on the UMAP.

**D)** Stacked bar chart showing the contribution of each patient to each inferred cell type subcluster in scATAC-seq.

**E)** UMAP plot of 17,677 scATAC-seq cells, as in **C**, but colored by prediction score.

**F)** Histogram of scATAC-seq inferred cell type subcluster prediction scores. The dashed vertical line in red at 0.5 represents a threshold cutoff for including cells in downstream analysis.



**Figure S15**

**A** scRNA-seq by cell type (as shown in Fig. 4)  
n=13,646 cells

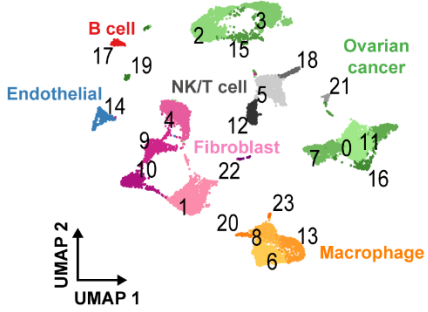

**C** # of inferCNV events per cell

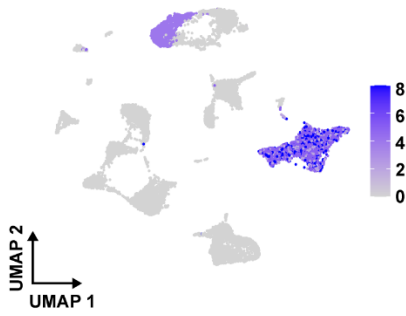

**D** MUC16/CA125 expression

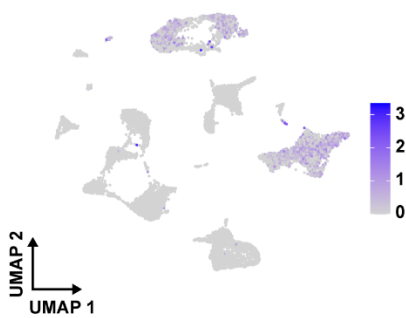

**E** WFDC2/HE4 expression

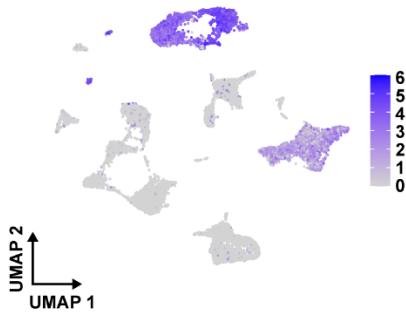

**B**

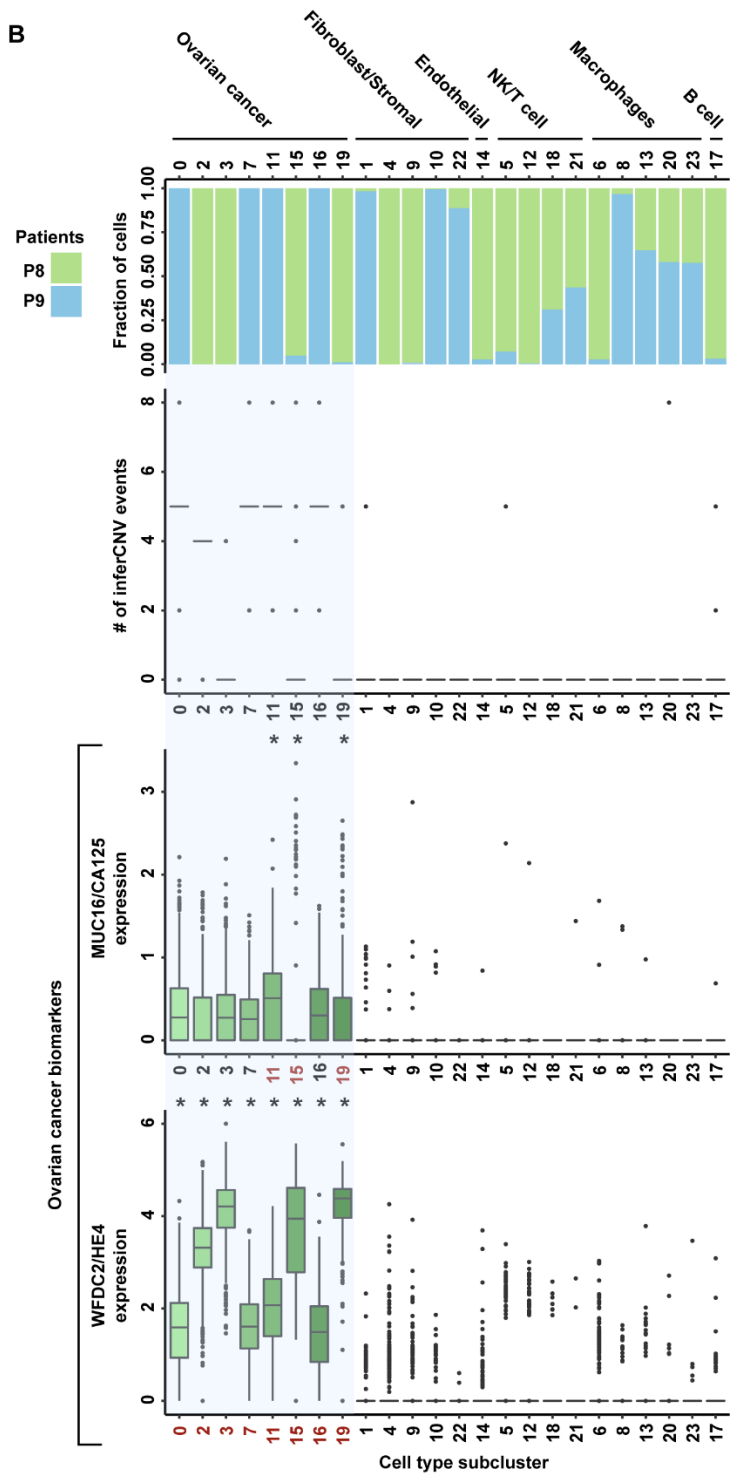

**Figure S15. Identification of malignant cell type subclusters in scRNA-seq across the High-Grade Serous Ovarian Cancer patient cohort (Patient 8 & 9), Related to Figure 4.**

**A)** UMAP plot of 13,646 scRNA-seq cells color-coded by cell type and cell type subcluster number.

**B)** Stacked bar chart showing the contribution of each patient to each cell type subcluster in scRNA-seq (*top*). Boxplot showing the number of inferCNV events in each cell type subcluster (*second from top*). The blue shadow highlights cell type subclusters that are predicted to be malignant. Boxplot showing the expression level of ovarian cancer biomarker *MUC16/CA125* across all cell type subclusters. The blue shadow highlights cell type subclusters that are predicted to be malignant. Asterisks denote a statistically significant difference in gene expression (Wilcoxon Rank Sum test, Bonferroni-corrected  $p$ -value  $<0.01$ ) between the marked cell type subcluster and the remaining cells outside of the blue shadow (*second from bottom*). Boxplot showing the expression level of ovarian cancer biomarker *WFDC2/HE4* across all cell type subclusters. The blue shadow highlights cell type subclusters that are predicted to be malignant. Asterisks denote a statistically significant difference in gene expression (Wilcoxon Rank Sum test, Bonferroni-corrected  $p$ -value  $<0.01$ ) between the marked cell type subcluster and the remaining cells outside of the blue shadow (*bottom*).

**C)** UMAP plot of 13,646 scRNA-seq cells, as in **A**, but colored by total number of inferCNV events per cell.

**D)** UMAP plot of 13,646 scRNA-seq cells, as in **A**, but colored by the normalized expression level of ovarian cancer biomarker *MUC16/CA125*.

**E)** UMAP plot of 13,646 scRNA-seq cells, as in **A**, but colored by the normalized expression level of ovarian cancer biomarker *WFDC2/HE4*.

**Figure S16**

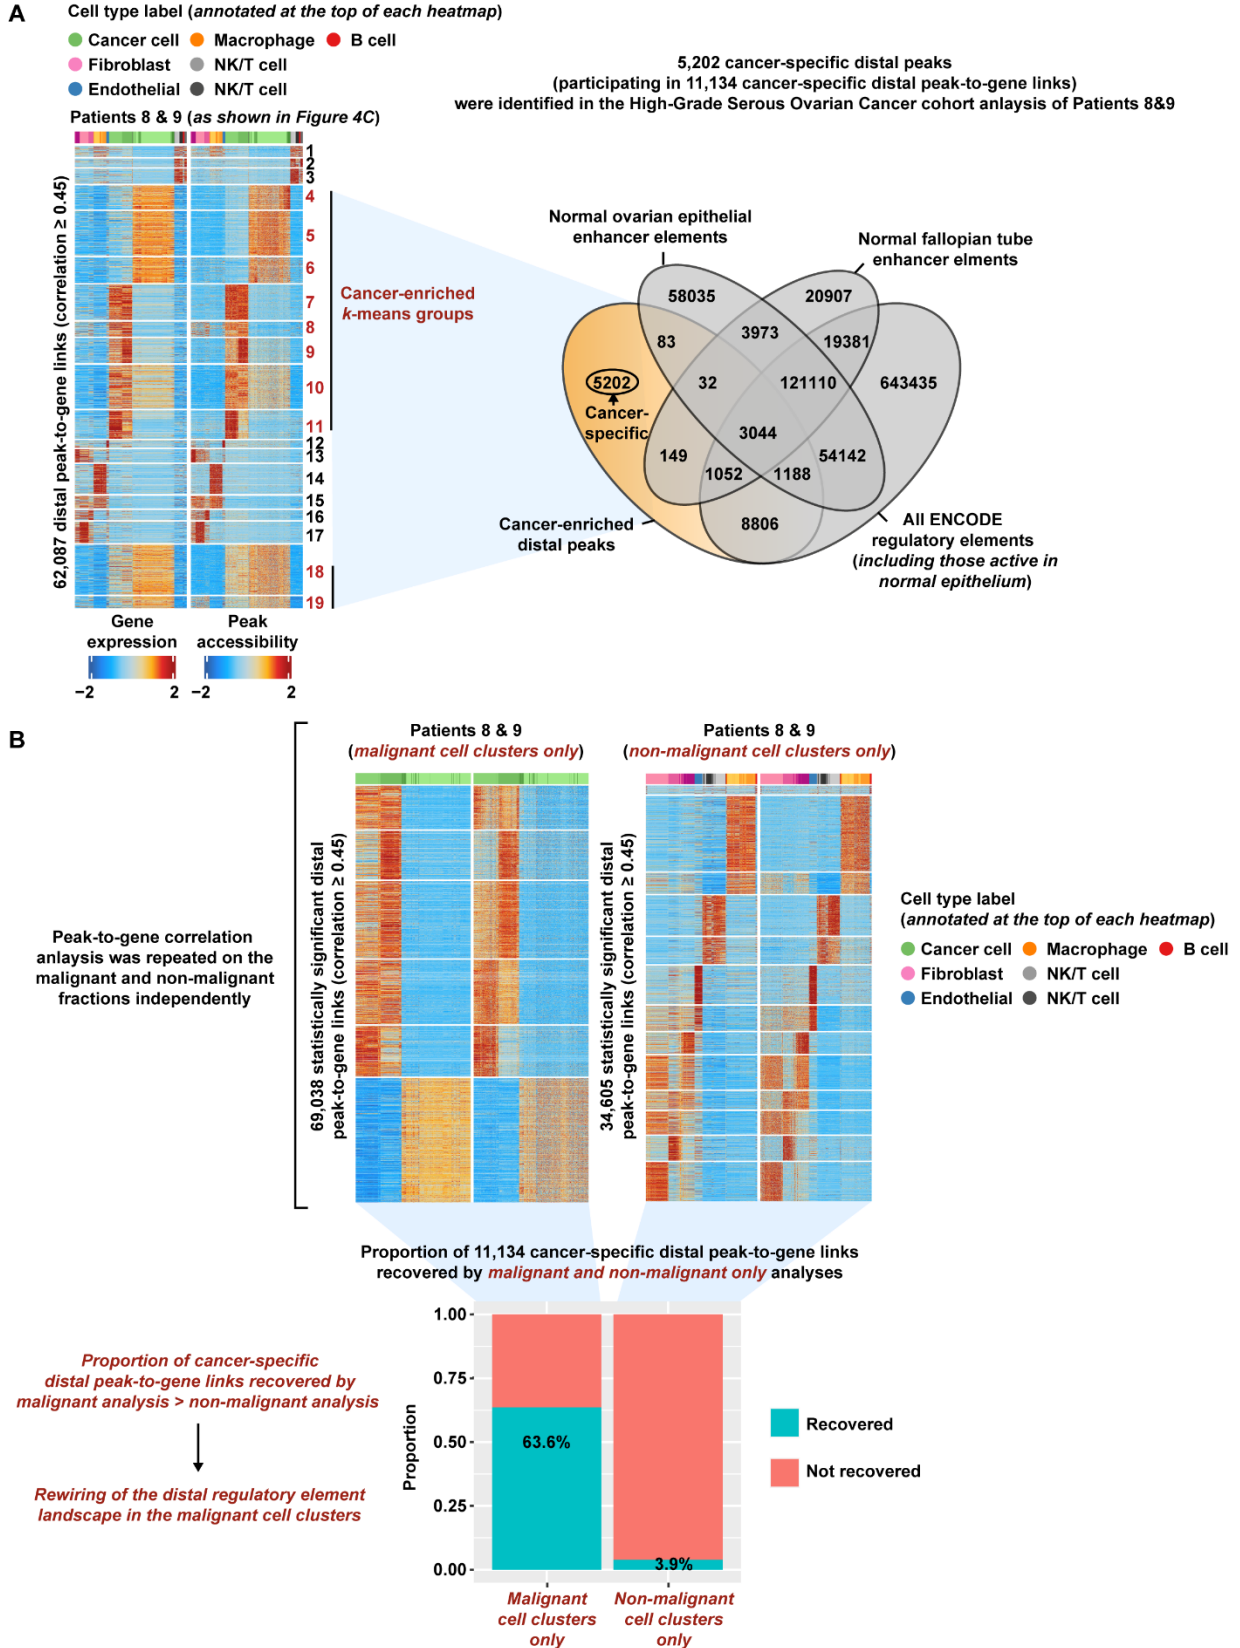

**Figure S16. Cancer-specific distal peak-to-gene links identified in the High-Grade Serous Ovarian Cancer patient cohort (Patients 8 & 9) are recovered by a malignant-specific peak-to-gene correlation analysis, Related to Figure 4.**

**A)** Row-scaled heatmaps of 62,087 statistically significant distal peak-to-gene links where each row represents the expression of a gene (*left*) correlated to the accessibility of a distal peak (*right*). Peak-to-gene links are grouped into *k*-means clusters and cancer-enriched *k*-means clusters are marked in red text. Cancer-enriched peaks that participate in cancer-enriched *k*-means groups are used as input into the genomic coordinate overlap analysis shown in the Venn diagram (*far right*). The Venn diagram shows the number of cancer-specific distal peaks (*orange slice*) after overlapping the genomic coordinates of cancer-enriched distal peaks with the genomic coordinates of normal ovarian surface epithelium enhancer elements, normal fallopian tube enhancer elements, and all ENCODE regulatory element annotations (*gray circles*).

**B)** Row-scaled heatmaps of statistically significant distal peak-to-gene links, as in **A**, but using only cells from malignant cell type subclusters (*left*) and non-malignant cell type subclusters (*right*). The proportion of cancer-specific distal peak-to-gene links recovered by each malignant and non-malignant-specific analysis is plotted in the stacked bar chart (*bottom*).

**Figure S17**

**A** Pseudo-bulk ATAC-seq coverage track using the *malignant* fractions from each HGSOC patient

chr8:97733556–97785057

Single-nucleotide variant (*chr8:97,742,106*)

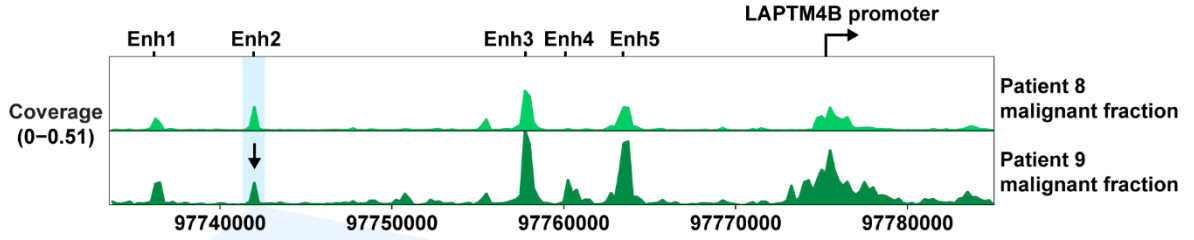

**B**

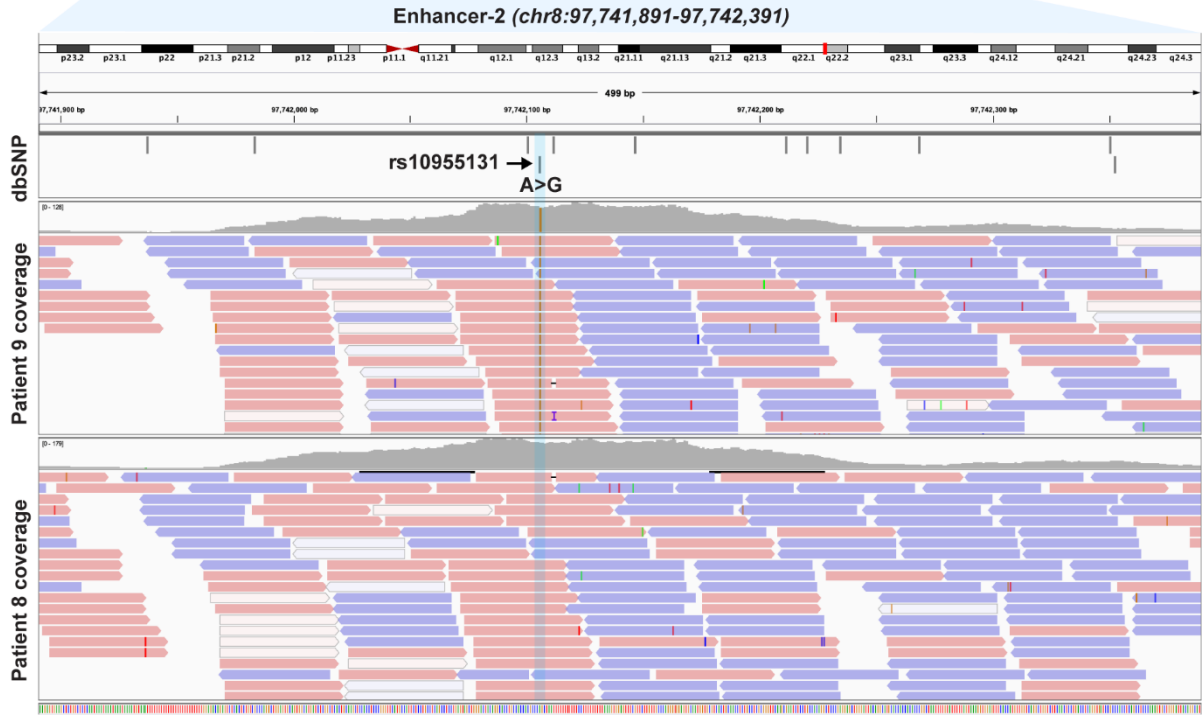

**Figure S17. Patient 9 malignant cells harbor an annotated SNP within the *LAPTM4B* Enhancer-2 region, Related to Figure 4.**

**A)** Browser track showing the accessibility of the *LAPTM4B* locus in malignant cell barcodes for the Patient 8 and Patient 9 tumor samples. The blue shadow denotes the Enhancer-2 region while the black arrow denotes the location of a single-nucleotide variant in the Patient 9 malignant cells.

**B)** Integrated Genomics Viewer (IGV) screenshot showing the pileup of scATAC-seq reads from malignant cell barcodes in the Patient 8 tumor sample (*bottom*) and in the Patient 9 tumor sample (*top*). The blue shadow and black arrow denote the location of the annotated variant present in the scATAC-seq reads from the Patient 9 tumor sample.

Figure S18

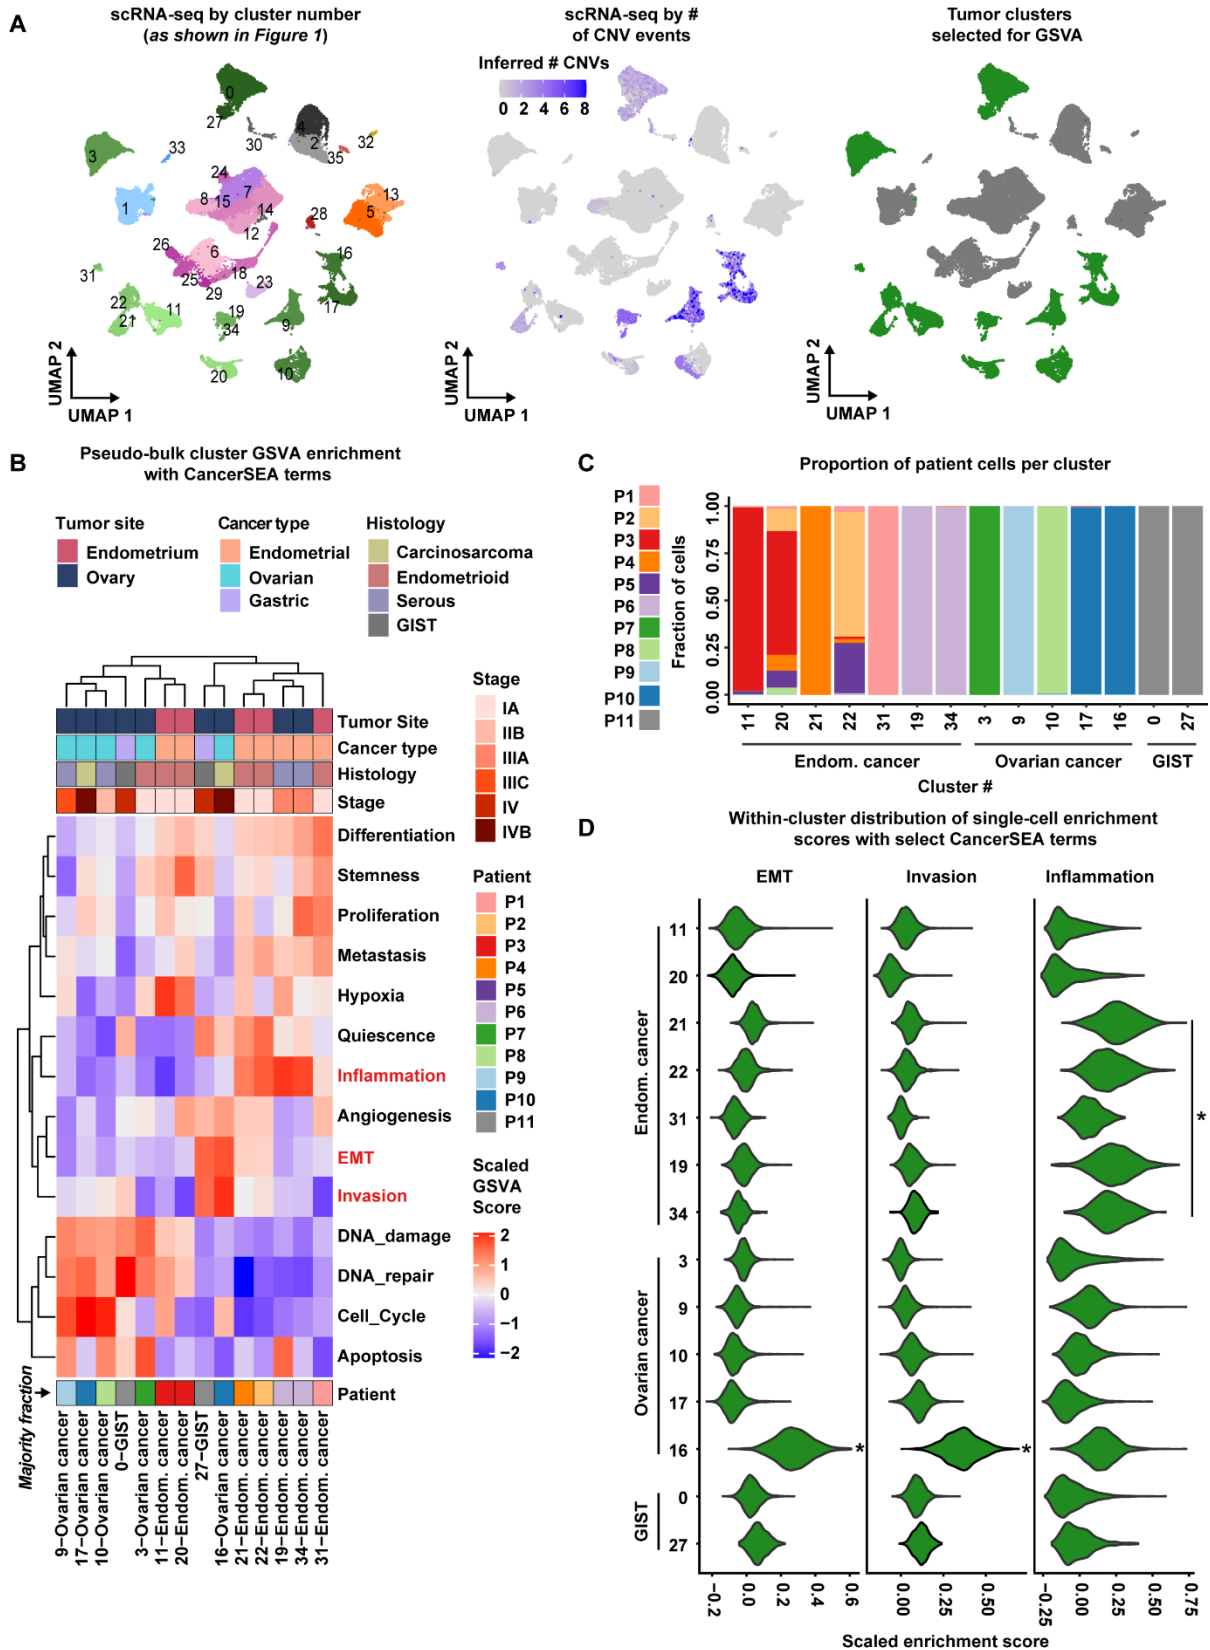

**Figure S18. Profiling malignant cell clusters in scRNA-seq with CancerSEA gene signatures representing 14 functional states of cancer, Related to Figures 1 & 6.**

**A)** UMAP plot of 75,523 scRNA-seq cells color-coded by cell type, by number of inferred CNVs and by selection for GSVA (*left, middle, right, respectively*). Note that the CNV events were inferred for each patient tumor individually and each CNV region has a posterior probability of being a normal diploid state  $<0.05$  as determined by inferCNV's Bayesian Network Latent Mixture Model.

**B)** Unsupervised hierarchical clustering heatmap of GSVA enrichment scores for 14 malignant cell type pseudo-bulk profiles. The patient identity for each pseudo-bulk cell type profile was determined based on the majority fraction of patient cells. Notable CancerSEA enrichment terms are marked in red text.

**C)** Stacked bar chart showing the contribution of each patient to each cell type subcluster in scRNA-seq.

**D)** Violin plots showing the within cluster distribution of single cell enrichment scores for three CancerSEA terms as calculated by Seurat's *AddModuleScore()*. Asterisks denote statistically significant differences in gene signature enrichment across all subclusters (Kruskal-Wallis test,  $p$ -value  $<0.01$ ).



Figure S19

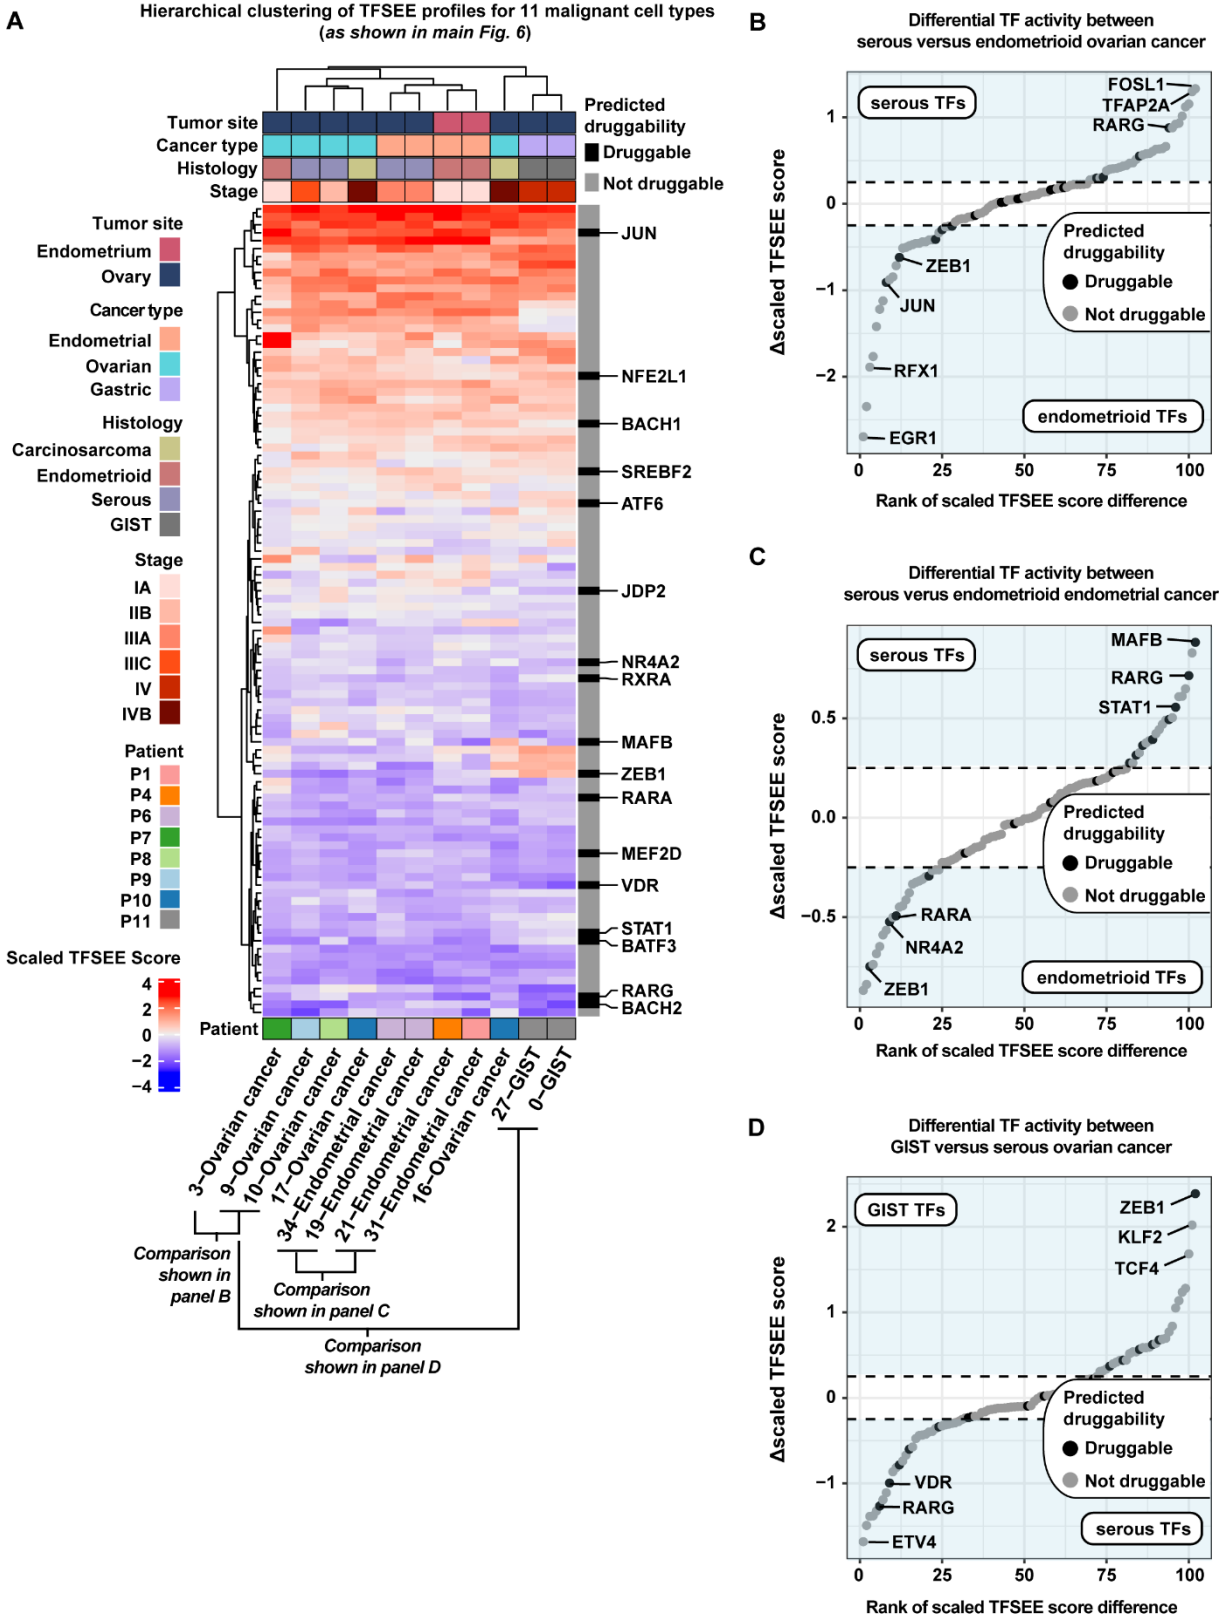

**Figure S19. Additional TFSEE analyses reveal active enhancers and their cognate TFs enriched in endometrial, ovarian and GIST tumors, Related to Figure 6.**

**A)** Unsupervised hierarchical clustering heatmap of cell type normalized TFSEE scores (n=102 TFs across active enhancers). Each row of the heatmap represents TF activity across cell type-specific enhancers enriched in each column. Theoretical druggability status for each TF is marked with druggable/not druggable according to the *canSAR* database. Select malignant cell type comparisons are annotated at the bottom for follow up in panels **B-D**.

**B)** Rank-ordered plot showing the difference in scaled TFSEE score for each TF between the mean of 9-,10-Ovarian cancer profiles and 3-Ovarian cancer (representing serous versus endometrioid ovarian cancer). Each point represents a TF and is colored by theoretical druggability status. Notable TFs enriched in either condition (serous/endometrioid) are labeled in the light blue regions of the plot.

**C)** Rank-ordered plot showing the difference in scaled TFSEE score for each TF between the mean of 19-,34-Endometrial cancer profiles and the mean of 21-,31-Endometrial cancer profiles (representing serous versus endometrioid endometrial cancer). Each point represents a TF and is colored by theoretical druggability status. Notable TFs enriched in either condition (serous/endometrioid) are labeled in the light blue regions of the plot.

**D)** Rank-ordered plot showing the difference in scaled TFSEE score for each TF between the mean of 0-,27-GIST profiles and the mean of 9-,10-Ovarian cancer profiles (representing GIST versus serous ovarian cancer). Each point represents a TF and is colored by theoretical druggability status. Notable TFs enriched in either condition (GIST/serous) are labeled in the light blue regions of the plot.

**Figure S20**

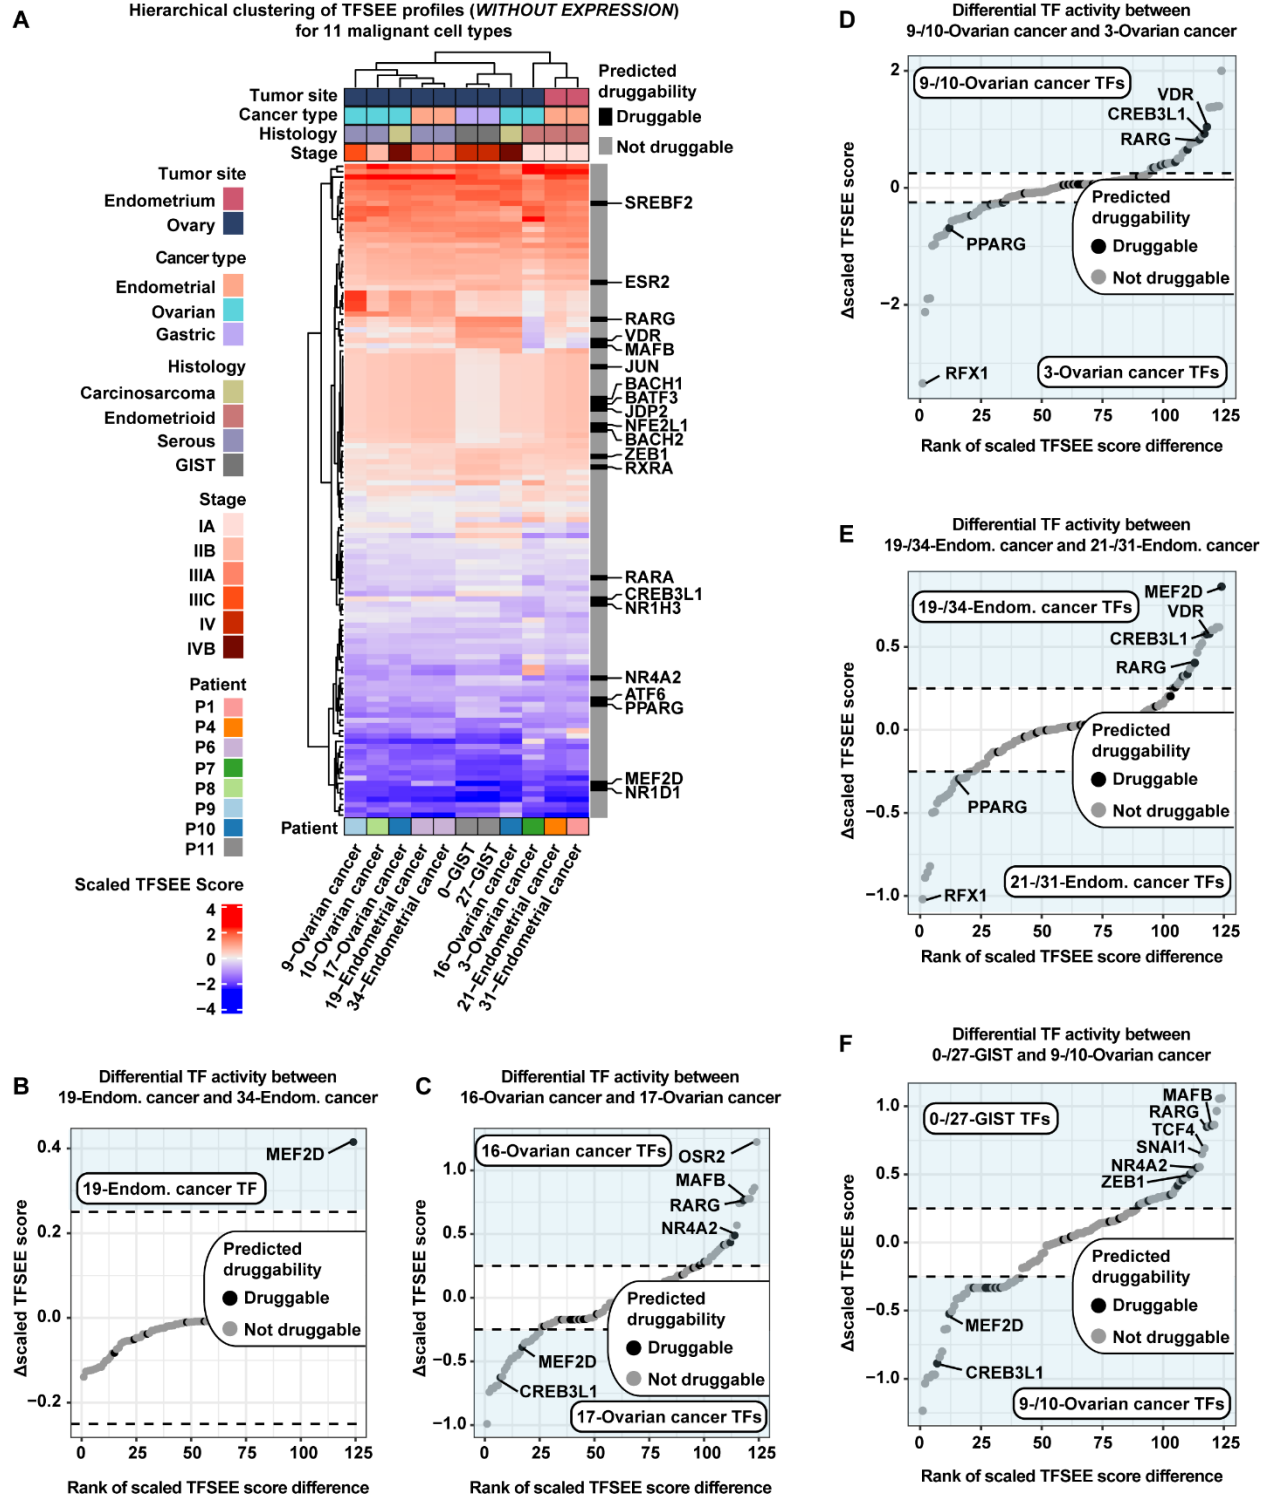

**Figure S20. TFSEE without expression provides alternate viewpoint of enriched enhancers and their cognate TFs in endometrial, ovarian and GIST tumors, Related to Figure 6.**

**A)** Unsupervised hierarchical clustering heatmap of cell type normalized expression-agnostic TFSEE scores (n=124 TFs across active enhancers). Each row of the heatmap represents expression-agnostic TF activity across cell type-specific enhancers enriched in each column. Theoretical druggability status for each TF is marked with druggable/not druggable according to the *canSAR* database.

**B)** Rank-ordered plot showing the difference in scaled expression-agnostic TFSEE score for each TF between 19-Endometrial cancer and 34-Endometrial cancer (representing subclone 1 versus subclone 2). Each point represents a TF and is colored by theoretical druggability status. Notable TFs enriched in either condition (subclone 1/subclone 2) are labeled in the light blue regions of the plot.

**C)** Rank-ordered plot, as in **B**, but comparing 16-Ovarian cancer with 17-Ovarian cancer (representing sarcoma versus carcinoma).

**D)** Rank-ordered plot, as in **B**, but comparing the mean of 9-,10-Ovarian cancer profiles with 3-Ovarian cancer (representing serous versus endometrioid ovarian cancer).

**E)** Rank-ordered plot, as in **B**, but comparing the mean of 19-,34-Endometrial cancer profiles with the mean of 21-,31-Endometrial cancer profiles (representing serous versus endometrioid endometrial cancer).

**F)** Rank-ordered plot, as in **B**, but comparing the mean of 0-,27-GIST profiles with the mean of 9-,10-Ovarian cancer profiles (representing GIST versus serous ovarian cancer).

**Table S6. sgRNA Oligonucleotides for CRISPRi (listed 5' to 3'), Related to STAR Methods.**

| Name              | Sequence                 | Genomic Coordinates    |
|-------------------|--------------------------|------------------------|
| sgScramble Fwd    | CACCGCTGATCTATCGCGGTCGTC | n/a                    |
| sgScramble Rev    | AAACGACGACCGCGATAGATCAGC | n/a                    |
| sgEnhancer2-1 Fwd | CACCGCAGCGTTACTGCCCTACTA | chr8:97743071-97743090 |
| sgEnhancer2-1 Rev | AAACTAGTAGGGCAGTAACGCTGC | chr8:97743071-97743090 |
| sgEnhancer2-2 Fwd | CACCGTGCGGTGCCTTTCAACTAG | chr8:97743164-97743182 |
| sgEnhancer2-2 Rev | AAACCTAGTTGAAAGGCACCGCAC | chr8:97743164-97743182 |
| sgEnhancer3-1 Fwd | CACCGGTGGATTGCGTTACTAATC | chr8:97758790-97758809 |
| sgEnhancer3-1 Rev | AAACGATTAGTAACGCAATCCACC | chr8:97758790-97758809 |
| sgEnhancer3-2 Fwd | CACCGGATTCCTTGGACATGCCAG | chr8:97759393-97759411 |
| sgEnhancer3-2 Rev | AAACCTGGCATGTCCAAGGAATCC | chr8:97759393-97759411 |

**Table S7. siRNA Sequences (listed 5' to 3', all except GAPDH were used as pools of 4 siRNAs), Related to STAR Methods.**

| siRNA Name       | Sequence            |
|------------------|---------------------|
| <i>GAPDH</i>     | UGGUUUACAUGUCCAAUA  |
| Non-Targeting #1 | UAAGGCUAUGAAGAGAUAC |
| Non-Targeting #2 | AUGUAUUGGCCUGUAUUAG |
| Non-Targeting #3 | AUGAACGUGAAUUGCUCAA |
| Non-Targeting #4 | UGGUUUACAUGUCGACUAA |
| YY1 #1           | GGAUAACUCGGCCAUGAGA |
| YY1 #2           | CAAGAAGAGUUACCUCAGC |
| YY1 #3           | GAACUCACCUCUGAUUUAU |
| YY1 #4           | GCUUAGUAAUGCUACGUGU |
| <i>CEBPD</i> #1  | GGGAGAAGAGCGCCGGCAA |
| <i>CEBPD</i> #2  | GAGAAGAGCGCCGGCAAGA |
| <i>CEBPD</i> #3  | UGGUGGAGCUGUCGGCUGA |
| <i>CEBPD</i> #4  | GCGCCUACAUCGACUCCAU |
| <i>KLF6</i> #1   | GCCUAGAGCUGGAACGUUA |
| <i>KLF6</i> #2   | GCAGGAAAGUUUACACCAA |
| <i>KLF6</i> #3   | UGCAAGAAGUGAUGAGUUA |
| <i>KLF6</i> #4   | AAAUUGAGCUCCUCUGUCA |

**Table S8. Oligonucleotides for RT-qPCR (listed 5' to 3'), Related to STAR Methods.**

| Oligonucleotide name | Sequence               |
|----------------------|------------------------|
| <i>ACTB</i> Fwd      | GACGACATGGAGAAAATCTG   |
| <i>ACTB</i> Rev      | ATGATCTGGGTCATCTTCTC   |
| <i>GAPDH</i> Fwd     | ACAGTTGCCATGTAGACC     |
| <i>GAPDH</i> Rev     | TTGAGCACAGGGTACTTTA    |
| <i>LAPTM4B</i> Fwd   | TGAACTGGGAGGTGACTTTGAG |
| <i>LAPTM4B</i> Rev   | TTGCTTGACGCTCCGTAAG    |
| <i>YY1</i> Fwd       | ACAAGAAGTGGGAGCAGAAG   |
| <i>YY1</i> Rev       | TTTTCATCTGAGGACCACATGG |
| <i>CEBPD</i> Fwd     | GCCATGTACGACGACGAGAG   |
| <i>CEBPD</i> Rev     | TGTGATTGCTGTTGAAGAGGTC |
| <i>KLF6</i> Fwd      | GCAACAGACCTGCCTAGAG    |
| <i>KLF6</i> Rev      | TTTTCTCCCGAGCCAGAATG   |
